# Supplementary material
Source: publisher figshare collection journal article supplement (https://microbiology.figshare.com/articles/dataset/_/3385777)
Supplement: Supplementary file 1 [file 1]

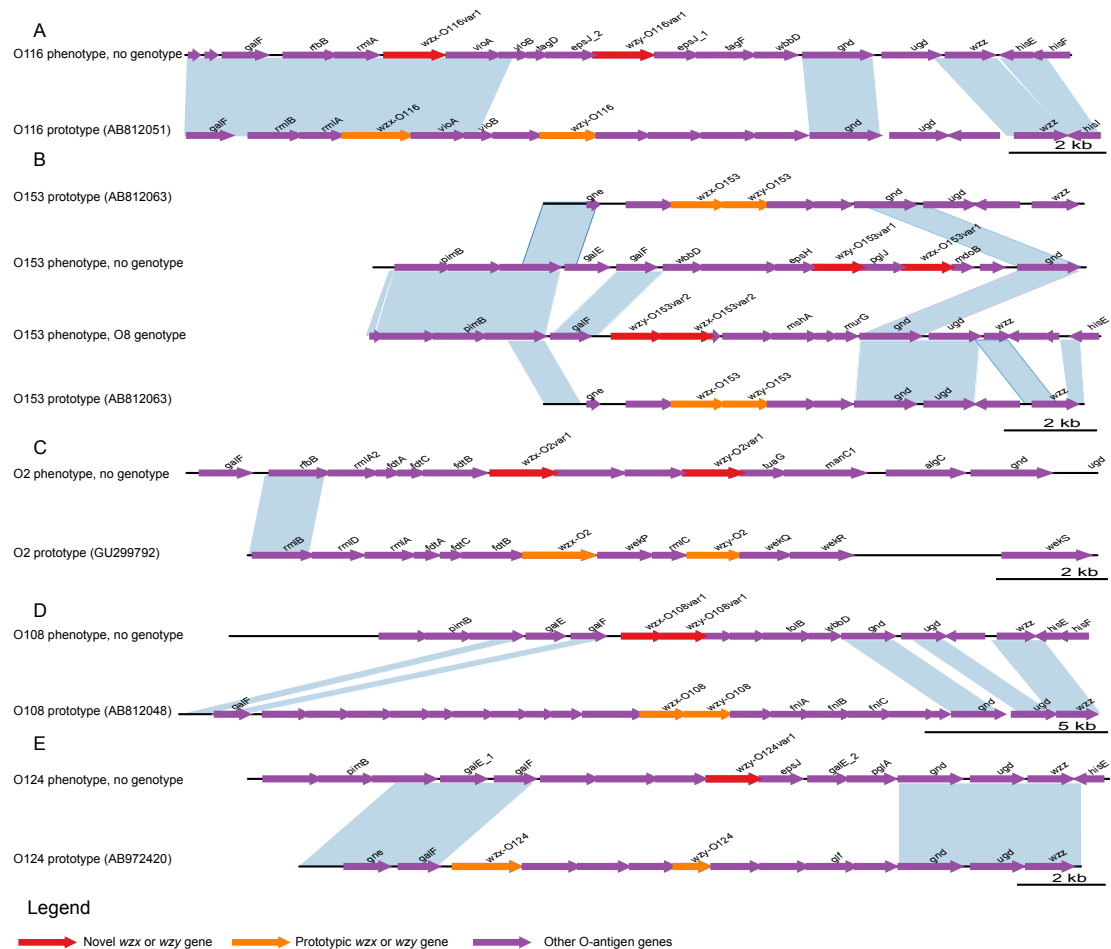

**Supplementary Figure 1. Characterisation of novel O-antigen loci with phenotype from the aEPEC isolates**

Schematic representations of novel O-antigen loci detected in this study, compared to prototypical loci corresponding to the O-groups that were identified by typing with antisera with a) O116 phenotype, b) O153 phenotype, c) O2 phenotype, d) O108 phenotype and e) O124 phenotypes. The blue coloured blocks indicate sequence homology of >75% identity.

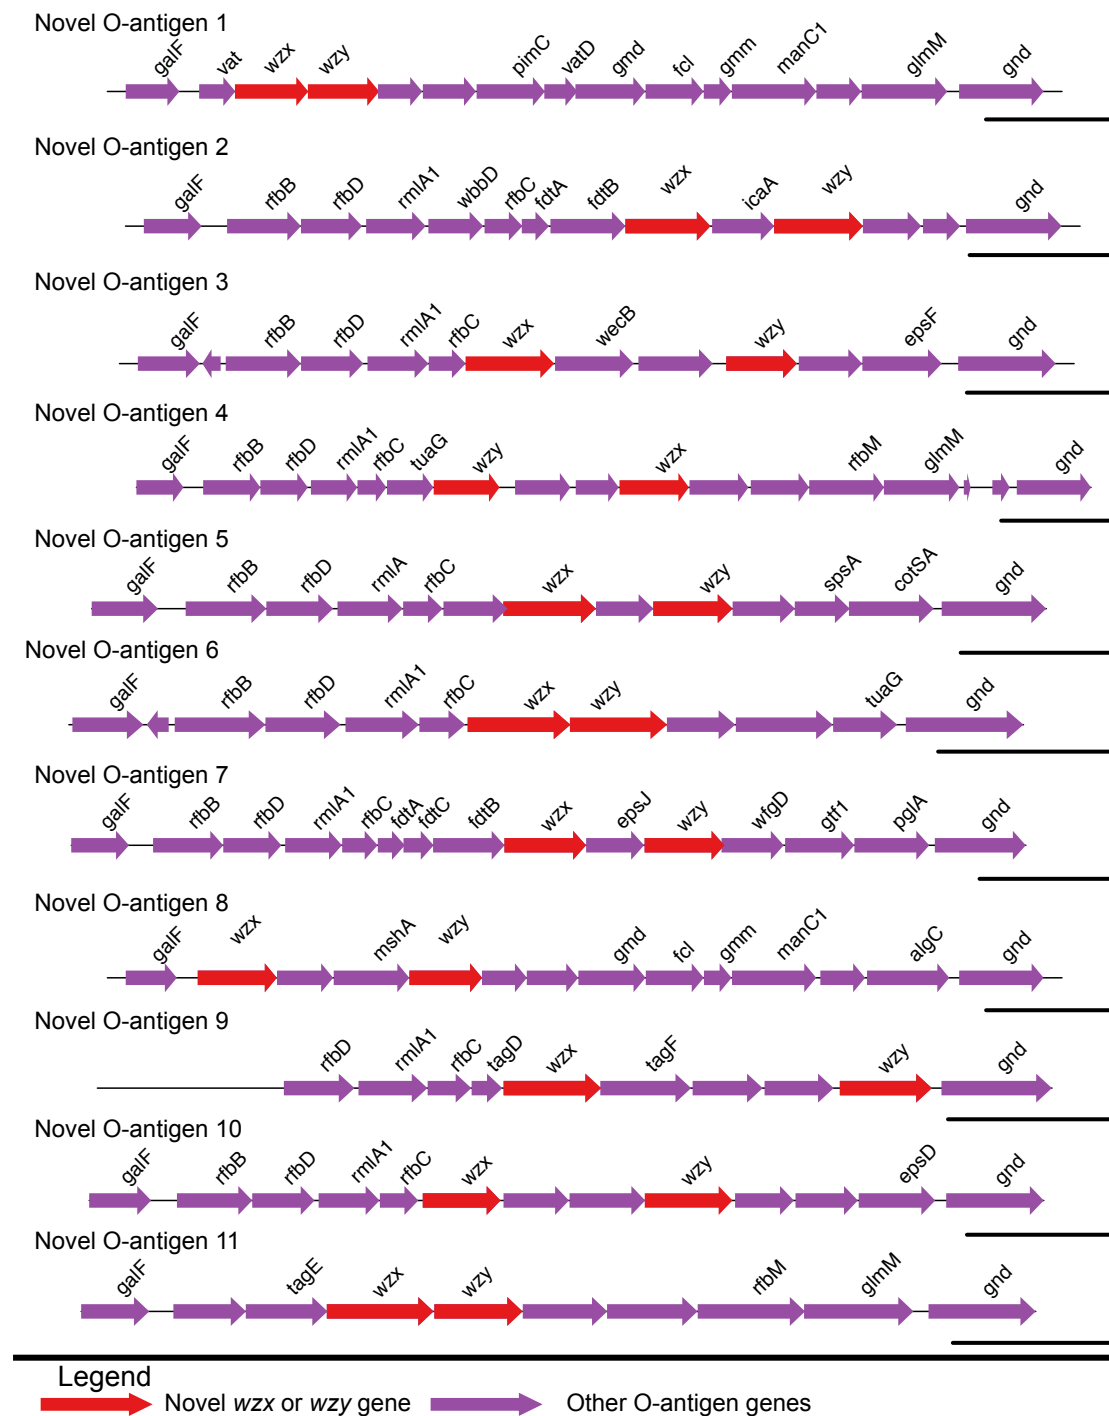

**Supplementary Figure 2. Characterisation of novel O-antigen loci**

Schematic illustrations of selected novel O-antigen loci detected from this study. The scale is shown by the black line beneath each O-antigen and is 2kb for all.

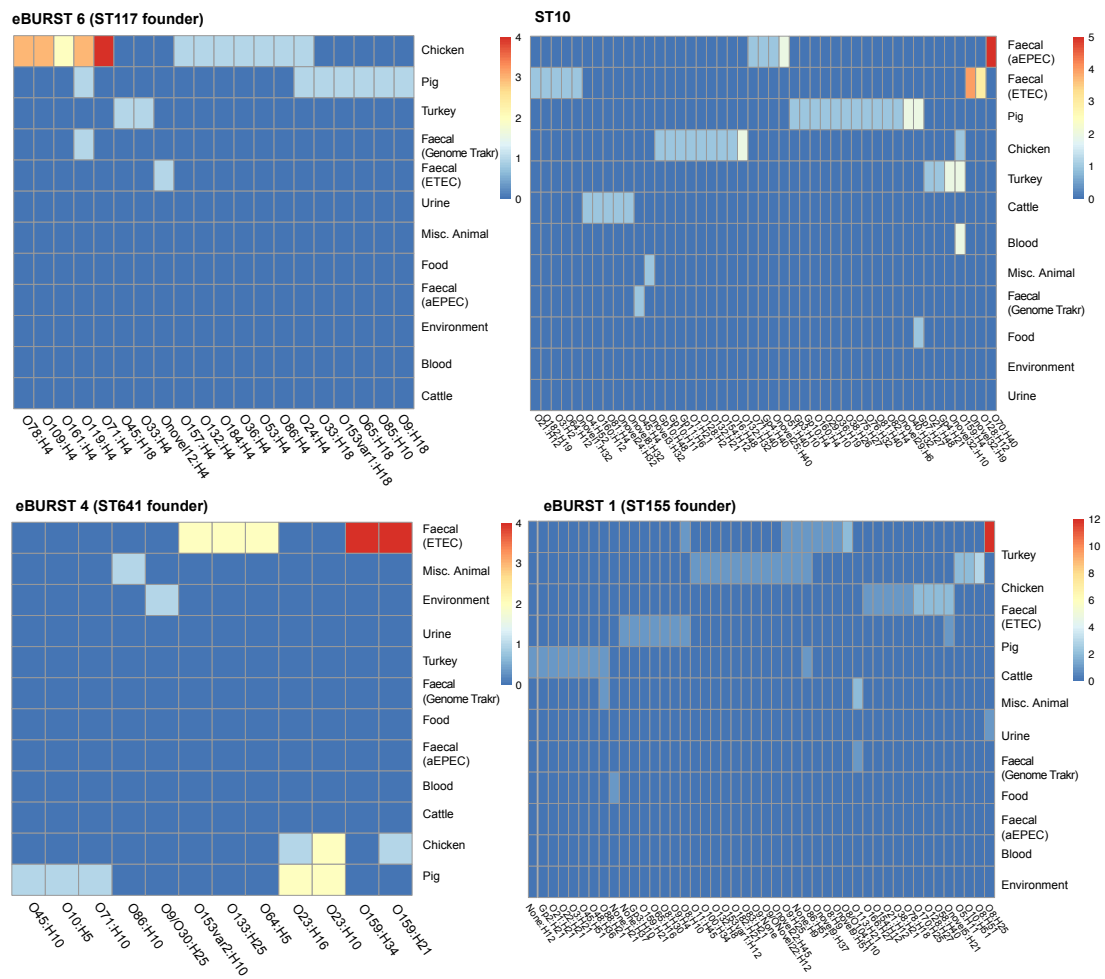

**Supplementary Figure 3: Diversity of serotypes and source in lineages**

The four heatmaps illustrate the diversity in three eBURST groups (which contain SLV of STs) and ST10. The scale at the top right for each panel represents the number of isolates with specific combinations for serotype and source within the group.
