# Supplementary material
Source: publisher figshare collection journal article supplement (https://microbiology.figshare.com/articles/dataset/_/3385777)
Supplement: Supplementary file 2 [file 1]

**Supplementary Table 2: Preliminary validation results of *in silico* serotyping against 41 public genome assemblies  
with reported serotypes**

| Isolate      | Accession   | Gene        | Reported | Blast+ result | SRST2 result | Coverage | Depth  | Diffs | Uncertainty | Divergence |
|--------------|-------------|-------------|----------|---------------|--------------|----------|--------|-------|-------------|------------|
| 536          | NC_008253   | <i>fliC</i> | H31      | H31           | H31          | 100      | 72.645 | 47snp |             | 2.818      |
| 536          | NC_008253   | <i>wzx</i>  | O6       | O6            | O6           | 100      | 66.308 |       |             | 0          |
| 536          | NC_008253   | <i>wzy</i>  | O6       | O6            | O6           | 100      | 67.846 | 1snp  |             | 0.074      |
| 12009        | NC_013353   | <i>fliC</i> | H2       | H2            | H2           | 100      | 63.414 |       |             | 0          |
| 12009        | NC_013353   | <i>wzx</i>  | O103     | O103          | O103         | 100      | 67.102 | 2snp  |             | 0.158      |
| 12009        | NC_013353   | <i>wzy</i>  | O103     | O103          | O103         | 100      | 61.95  | 2snp  |             | 0.174      |
| 11128        | NC_013364   | <i>wzx</i>  | O111     | O111          | O111         | 100      | 66.801 |       |             | 0          |
| 11128        | NC_013364   | <i>wzy</i>  | O111     | O111          | O111         | 100      | 57.491 |       |             | 0          |
| 11368        | NC_013361   | <i>fliC</i> | H11      | H11           | H11          | 100      | 60.43  |       |             | 0          |
| 11368        | NC_013361   | <i>wzx</i>  | O26      | O26           | O26          | 100      | 58.613 |       |             | 0          |
| 11368        | NC_013361   | <i>wzy</i>  | O26      | O26           | O26          | 100      | 57.426 |       |             | 0          |
| 55989        | NC_011748   | <i>fliC</i> | H4       | H4            | H4           | 100      | 68.39  |       |             | 0          |
| 55989        | NC_011748   | <i>wzx</i>  | O104     | O104          | O104         | 100      | 66.659 | 1snp  |             | 0.078      |
| 55989        | NC_011748   | <i>wzy</i>  | O104     | O104          | O104         | 100      | 68.451 | 4snp  |             | 0.359      |
| APEC_O78     | CP004009    | <i>wzx</i>  | O78      | O78           | O78          | 100      | 74.335 | 1snp  |             | 0.071      |
| APEC_O78     | CP004009    | <i>wzy</i>  | O78      | O78           | O78          | 100      | 70.872 | 5snp  |             | 0.446      |
| APEC01       | NC_008563   | <i>wzx</i>  | O1       | O1            | O1           | 100      | 56.318 | 2snp  |             | 0.163      |
| APEC01       | NC_008563   | <i>wzy</i>  | O1       | O1            | O1           | 100      | 59.354 | 2snp  |             | 0.199      |
| ATCC8739     | NC_010468   | <i>wzx</i>  | O146     | O146          | O146         | 100      | 69.192 | 10snp |             | 0.65       |
| ATCC8739     | NC_010468   | <i>wzy</i>  | O146     | O146          | O146         | 100      | 73.081 | 4snp  |             | 0.339      |
| B_str_REL606 | NC_012967   | <i>wzx</i>  | O7       | O7            | O7           | 100      | 76.175 | 1snp  |             | 0.07       |
| B_str_REL606 | NC_012967   | <i>wzy</i>  | O7       | O7            | O7           | 100      | 73.612 |       |             | 0          |
| BL21-DE3     | NC_012971   | <i>wzx</i>  | O7       | O7            | O7           | 100      | 69.054 |       |             | 0          |
| BL21-DE3     | NC_012971   | <i>wzy</i>  | O7       | O7            | O7           | 100      | 72.365 |       |             | 0          |
| BL21-Gold    | NC_012947.1 | <i>wzx</i>  | O7       | O7            | O7           | 100      | 83.374 |       |             | 0          |
| BL21-Gold    | NC_012947.1 | <i>wzy</i>  | O7       | O7            | O7           | 100      | 77.093 |       |             | 0          |
| CB9615       | NC_013941   | <i>fliC</i> | H7       | H7            | H7           | 100      | 67.35  |       |             | 0          |



**Supplementary Table 2: Preliminary validation results of *in silico* serotyping against 41 public genome assemblies with reported serotypes**

| Isolate           | Accession | Gene | Reported | Blast+ result | SRST2 result | Coverage | Depth  | Diffs  | Uncertainty | Divergence |
|-------------------|-----------|------|----------|---------------|--------------|----------|--------|--------|-------------|------------|
| CB9615            | NC_013941 | wzx  | O55      | O55           | O55          | 100      | 67.629 |        |             | 0          |
| CB9615            | NC_013941 | wzy  | O55      | O55           | O55          | 100      | 65.309 |        |             | 0          |
| CE10              | NC_017646 | wzx  | O7       | O7            | O7           | 100      | 66.232 |        |             | 0          |
| CE10              | NC_017646 | wzy  | O7       | O7            | O7           | 99.915   | 66.563 | 1indel |             | 0          |
| CFT073            | NC_004431 | fliC | H1       | H1            | H1           | 100      | 71.246 |        |             | 0          |
| CFT073            | NC_004431 | wzx  | O6       | O6            | O6           | 100      | 70.055 |        |             | 0          |
| CFT073            | NC_004431 | wzy  | O6       | O6            | O6           | 100      | 64.177 | 2snp   |             | 0.149      |
| K-12_substr_DH10B | NC_010473 | wzx  | O16      | O16           | O16          | 100      | 70.173 |        |             | 0          |
| K-12_substr_DH10B | NC_010473 | wzy  | O16      | O16           | O16          | 100      | 74.333 |        |             | 0          |
| E2348/69          | NC_011601 | fliC | H6       | H6            | H6           | 100      | 69.654 | 12snp  |             | 0.729      |
| E2348/69          | NC_011601 | wzx  | O127     | O127          | O127         | 100      | 67.362 |        |             | 0          |
| E2348/69          | NC_011601 | wzy  | O127     | O127          | O127         | 100      | 72.561 |        |             | 0          |
| EC4115            | NC_011353 | fliC | H7       | H7            | H7           | 100      | 66.001 |        |             | 0          |
| EC4115            | NC_011353 | wzx  | O157     | O157          | O157         | 100      | 56.534 |        |             | 0          |
| EC4115            | NC_011353 | wzy  | O157     | O157          | O157         | 100      | 66.09  | 1snp   |             | 0.084      |
| ED1a              | NC_011745 | wzx  | O81      | O81           | O81          | 100      | 68.21  |        |             | 0          |
| ED1a              | NC_011745 | wzy  | O81      | O81           | O81          | 100      | 62.546 |        |             | 0          |
| EDL933            | NC_002655 | fliC | H7       | H7            | H7           | 100      | 63.628 | 1snp   |             | 0.057      |
| EDL933            | NC_002655 | wzx  | O157     | O157          | O157         | 100      | 64.826 |        |             | 0          |
| EDL933            | NC_002655 | wzy  | O157     | O157          | O157         | 100      | 57.896 | 1snp   |             | 0.084      |
| EL-2071           | CP003301  | fliC | H4       | H4            | H4           | 100      | 69.741 |        |             | 0          |
| EL-2071           | CP003301  | wzx  | O104     | O104          | O104         | 100      | 62.335 |        |             | 0          |
| EL-2071           | CP003301  | wzy  | O104     | O104          | O104         | 100      | 60.478 | 4snp   |             | 0.359      |
| H10407            | NC_017633 | fliC | H11      | H11           | H11          | 100      | 69.405 |        |             | 0          |
| H10407            | NC_017633 | wzx  | O78      | O78           | O78          | 100      | 70.418 | 1snp   |             | 0.071      |
| H10407            | NC_017633 | wzy  | O78      | O78           | O78          | 100      | 60.13  | 5snp   |             | 0.446      |
| HS                | CP000802  | wzm  | O9       | O9            | O9           | 100      | 69.706 | 14snp  |             | 1.781      |



**Supplementary Table 2: Preliminary validation results of *in silico* serotyping against 41 public genome assemblies  
with reported serotypes**

| Isolate            | Accession | Gene        | Reported | Blast+ result | SRST2 result | Coverage | Depth  | Diffs      | Uncertainty | Divergence |
|--------------------|-----------|-------------|----------|---------------|--------------|----------|--------|------------|-------------|------------|
| HS                 | CP000802  | <i>wzt</i>  | O9       | O9            | O9           | 99.923   | 71.897 | 2snp1indel |             | 3.241      |
| IAI1               | NC_011741 | <i>wzm</i>  | O8       | O8            | O8           | 100      | 64.781 | 5snp       |             | 0.629      |
| IAI1               | NC_011741 | <i>wzt</i>  | O8       | O8            | O8           | 100      | 68.502 | 5snp       |             | 0.412      |
| IAI39              | NC_011750 | <i>wzx</i>  | O7       | O7            | O7           | 100      | 65.838 |            |             | 0          |
| IAI39              | NC_011750 | <i>wzy</i>  | O7       | O7            | O7           | 100      | 64.266 |            |             | 0          |
| IHE3034            | NC_017628 | <i>wzx</i>  | O18      | O18           | O18          | 100      | 66.773 | 2snp       |             | 0.16       |
| IHE3034            | NC_017628 | <i>wzy</i>  | O18      | O18           | O18          | 100      | 66.731 | 1snp       |             | 0.084      |
| K-12_substr_W3110  | NC_007779 | <i>wzx</i>  | O16      | O16           | O16          | 100      | 72.556 |            |             | 0          |
| K-12_substr_W3110  | NC_007779 | <i>wzy</i>  | O16      | O16           | O16          | 100      | 71.129 |            |             | 0          |
| K-12_substr_MG1655 | NC_000913 | <i>wzx</i>  | O16      | O16           | O16          | 100      | 66.441 |            |             | 0          |
| K-12_substr_MG1655 | NC_000913 | <i>wzy</i>  | O16      | O16           | O16          | 100      | 73.294 |            |             | 0          |
| NRG857C            | NC_017634 | <i>fliC</i> | H1       | H1            | H1           | 100      | 75.528 |            |             | 0          |
| NRG857C            | NC_017634 | <i>wzx</i>  | O83      | O83           | O83          | 100      | 66.081 | 1snp       |             | 0.069      |
| NRG857C            | NC_017634 | <i>wzy</i>  | O83      | O83           | O83          | 100      | 66.916 |            |             | 0          |
| O42                | NC_017626 | <i>wzx</i>  | O44      | O44           | O44          | 100      | 66.449 |            |             | 0          |
| O42                | NC_017626 | <i>wzy</i>  | O44      | O17           | O77          | 100      | 61.128 |            |             | 0          |
| p12b               | NC_017663 | <i>fliC</i> | H17      | H4            | H4           | 100      | 72.548 | 7snp       |             | 0.667      |
| p12b               | NC_017663 | <i>fliA</i> | H17      | H17           | H17          | 100      | 72.113 |            |             | 0          |
| RM12579            | NC_017656 | <i>fliC</i> | H7       | H7            | H7           | 100      | 68.684 |            |             | 0          |
| RM12579            | NC_017656 | <i>wzx</i>  | O55      | O55           | O55          | 100      | 65.32  |            |             | 0          |
| RM12579            | NC_017656 | <i>wzy</i>  | O55      | O55           | O55          | 100      | 63.159 |            |             | 0          |
| S88                | NC_011742 | <i>fliC</i> | H7       | H7            | H7           | 100      | 70.367 |            |             | 0          |
| S88                | NC_011742 | <i>wzx</i>  | O45      | O45           | O45          | 100      | 65.614 |            |             | 0          |
| S88                | NC_011742 | <i>wzy</i>  | O45      | O45           | O45          | 100      | 68.822 |            |             | 0          |
| SAKAI              | NC_002695 | <i>fliC</i> | H7       | H7            | H7           | 100      | 59.861 |            |             | 0          |
| SAKAI              | NC_002695 | <i>wzx</i>  | O157     | O157          | O157         | 100      | 66.442 |            |             | 0          |
| SAKAI              | NC_002695 | <i>wzy</i>  | O157     | O157          | O157         | 100      | 62.395 | 1snp       |             | 0.084      |



**Supplementary Table 2: Preliminary validation results of *in silico* serotyping against 41 public genome assemblies with reported serotypes**

| Isolate  | Accession | Gene        | Reported | Blast+ result | SRST2 result | Coverage | Depth  | Diffs    | Uncertainty | Divergence |
|----------|-----------|-------------|----------|---------------|--------------|----------|--------|----------|-------------|------------|
| SE11     | NC_011415 | <i>fliC</i> | H28      | H28           | H28          | 100      | 69.52  | 21snp    |             | 1.207      |
| SE11     | NC_011415 | <i>wzx</i>  | O152     | O173          | O173         | 99.833   | 63.844 | 2snp2hol | edge0.0     | 1.002      |
| SE11     | NC_011415 | <i>wzy</i>  | O152     | O173          | O173         | 100      | 62.898 | 11snp    |             | 1.019      |
| SE15     | NC_013654 | <i>fliC</i> | H5       | H5            | H5           | 100      | 69.559 | 11snp    |             | 0.839      |
| SE15     | NC_013654 | <i>wzx</i>  | O150     | O16           | O16          | 100      | 69.567 |          |             | 0          |
| SE15     | NC_013654 | <i>wzy</i>  | O150     | O16           | O16          | 100      | 65.667 |          |             | 0          |
| TW14359  | NC_013008 | <i>fliC</i> | H7       | H7            | H7           | 100      | 62.298 |          |             | 0          |
| TW14359  | NC_013008 | <i>wzx</i>  | O157     | O157          | O157         | 100      | 64.424 |          |             | 0          |
| TW14359  | NC_013008 | <i>wzy</i>  | O157     | O157          | O157         | 100      | 65.575 | 1snp     |             | 0.084      |
| UMN026   | NC_011751 | <i>fliC</i> | H18      | H18           | H18          | 100      | 65.3   |          |             | 0          |
| UMN026   | NC_011751 | <i>wzx</i>  | O17      | O17           | O17          | 100      | 66.491 |          |             | 0          |
| UMN026   | NC_011751 | <i>wzy</i>  | O17      | O17           | O77          | 100      | 63.455 |          |             | 0          |
| UMNF18   | CP002890  | <i>wzx</i>  | O147     | O147          | O147         | 100      | 61.154 |          |             | 0          |
| UMNF18   | CP002890  | <i>wzy</i>  | O147     | O147          | O147         | 100      | 61.378 |          |             | 0          |
| UMNK88   | NC_017641 | <i>wzx</i>  | O149     | O149          | O149         | 99.916   | 58.293 | 1indel   |             | 0          |
| UMNK88   | NC_017641 | <i>wzy</i>  | O149     | O149          | O149         | 100      | 64.085 |          |             | 0          |
| UT189    | NC_007946 | <i>wzx</i>  | O18      | O18           | O18          | 100      | 65.882 | 2snp     |             | 0.16       |
| UT189    | NC_007946 | <i>wzy</i>  | O18      | O18           | O18          | 100      | 67.839 | 1snp     |             | 0.084      |
| Xuzhou21 | NC_017906 | <i>fliC</i> | H7       | H7            | H7           | 100      | 63.155 |          |             | 0          |
| Xuzhou21 | NC_017906 | <i>wzx</i>  | O157     | O157          | O157         | 100      | 67.413 |          |             | 0          |
| Xuzhou21 | NC_017906 | <i>wzy</i>  | O157     | O157          | O157         | 100      | 60.221 | 1snp     |             | 0.084      |

Coverage = percentage of the gene length that was covered

Depth = mean read depth across the length of all alleles which were assigned a top scoring allele number

Diffs = differences between the detected allele and the best scoring allele.

Uncertainty = details of parts of the top scoring alleles for which the depth of coverage was too low to give confidence in the result



**Supplementary Table 2: Preliminary validation results of *in silico* serotyping against 41 public genome assemblies with reported serotypes**

| Isolate | Accession | Gene | Reported | Blast+ result | SRST2 result | Coverage | Depth | Diffs | Uncertainty | Divergence |
|---------|-----------|------|----------|---------------|--------------|----------|-------|-------|-------------|------------|
|---------|-----------|------|----------|---------------|--------------|----------|-------|-------|-------------|------------|

Divergence = divergence of allele detected to sequence database (ran with option to report <10% divergence)

Reported =reported phenotype of the isolate

SRST2 = call from short read data and the EcOH database

BLAST+ = call from BLAST analysis of Velvet assemblies and the EcOH database
