# Supplementary material
Source: publisher figshare collection journal article supplement (https://microbiology.figshare.com/articles/dataset/_/3385777)
Supplement: Supplementary file 3 [file 1]

**Supplementary Table 3: Serotyping results for 144 EPEC isolates with a serologically determined O-group**

| Isolate   | Gene | Reported    | SRST2 | Coverage | Depth   | Diffs               | Uncertainty | Divergence | BLAST+ |
|-----------|------|-------------|-------|----------|---------|---------------------|-------------|------------|--------|
| ERR137822 | wzx  | O165        | O165  | 100      | 112.949 |                     |             | 0          | O165   |
| ERR137822 | wzy  | O165        | O165  | 100      | 90.823  |                     |             | 0          | O165   |
| ERS085334 | wzx  | O118        | O118  | 100      | 185.592 |                     |             | 0          | O118   |
| ERS085334 | wzy  | O118        | O151  | 100      | 179.838 | 1snp                |             | 0.091      | O151   |
| ERS085335 | wzx  | O55         | O55   | 100      | 164.306 |                     |             | 0          | O55    |
| ERS085335 | wzy  | O55         | O55   | 100      | 163.968 |                     |             | 0          | O55    |
| ERS085337 | wzx  | O123        | O123  | 100      | 213.728 |                     |             | 0          | O123   |
| ERS085337 | wzy  | O123        | O186  | 100      | 197.228 |                     |             | 0          | O186   |
| ERS085338 | wzx  | O171        | O70   | 100      | 15.907  | 33snp               |             | 2.638      | O171   |
| ERS085338 | wzy  | O171        | O70   | 99.844   | 16.977  | 38snp2indel         |             | 2.966      | O171   |
| ERS085339 | wzx  | O146        | O146  | 100      | 184.805 | 1snp                |             | 0.065      | O146   |
| ERS085339 | wzy  | O146        | O146  | 100      | 172.327 |                     |             | 0          | O146   |
| ERS085340 | wzx  | O33 related | O33   | 100      | 134.733 |                     |             | 0          | O33    |
| ERS085340 | wzy  | O33 related | O33   | 100      | 132.765 |                     |             | 0          | O33    |
| ERS085342 | wzx  | O118        | O118  | 100      | 148.132 |                     |             | 0          | O118   |
| ERS085342 | wzy  | O118        | O151  | 100      | 143.012 |                     |             | 0          | O151   |
| ERS085343 | wzx  | O103        | O111  | 99.842   | 12.375  | 2holes              | edge0.0     | 0          | O103   |
| ERS085343 | wzy  | O103        | O111  | 100      | 10.716  | 1snp                | edge2.0     | 0.095      | O103   |
| ERS085344 | wzx  | O33 related | O116  | 99.3     | 97.475  | 144snp2indel9holes  |             | 10.148     | NC     |
| ERS085344 | wzy  | O33 related | NC    | NA       | NA      |                     |             | NA         | NC     |
| ERS085345 | wzx  | O116        | O116  | 98.529   | 111.498 | 141snp2indel20holes |             | 10.014     | NC     |
| ERS085345 | wzy  | O116        | NC    | NA       | NA      |                     |             | NA         | NC     |
| ERS085346 | wzx  | O136        | O136  | 100      | 132.281 |                     |             | 0          | O136   |
| ERS085346 | wzy  | O136        | O136  | 100      | 136.52  | 1snp                |             | 0.081      | O136   |
| ERS085347 | wzm  | O77         | O101  | 100      | 167.283 |                     |             | 0          | O101   |
| ERS085347 | wzt  | O77         | O101  | 100      | 182.435 |                     |             | 0          | O101   |
| ERS085348 | wzx  | O162        | O70   | 100      | 179.169 | 33snp               |             | 2.638      | O70    |
| ERS085348 | wzy  | O162        | O70   | 99.844   | 178.105 | 37snp2indel         |             | 2.888      | O70    |

**Supplementary Table 3: Serotyping results for 144 EPEC isolates with a serologically determined O-group**

| Isolate   | Gene | Reported | SRST2 | Coverage | Depth   | Diffs               | Uncertainty | Divergence | BLAST+ |
|-----------|------|----------|-------|----------|---------|---------------------|-------------|------------|--------|
| ERS085350 | wzx  | O38      | O38   | 100      | 137.699 | 3snp                |             | 0.229      | O38    |
| ERS085350 | wzy  | O38      | O38   | 100      | 124.187 | 6snp                |             | 0.489      | O38    |
| ERS085351 | wzx  | O111     | O111  | 99.842   | 112.908 | 2holes              | edge0.0     | 0          | O111   |
| ERS085351 | wzy  | O111     | O111  | 100      | 92.005  | 1snp                |             | 0.095      | O111   |
| ERS085352 | wzx  | O108     | O108  | 100      | 142.335 |                     |             | 0          | O108   |
| ERS085352 | wzy  | O108     | O108  | 100      | 141.842 | 1snp                |             | 0.081      | O108   |
| ERS085353 | wzx  | O63      | O63   | 100      | 113.752 | 2snp                |             | 0.158      | O63    |
| ERS085353 | wzy  | O63      | O63   | 100      | 94.793  | 3snp                |             | 0.229      | O63    |
| ERS085355 | wzx  | O45      | O45   | 100      | 134.852 |                     |             | 0          | O45    |
| ERS085355 | wzy  | O45      | O45   | 100      | 131.066 |                     |             | 0          | O45    |
| ERS085356 | wzx  | O116     | O116  | 98.179   | 125.566 | 141snp2indel25holes |             | 10.05      | NC     |
| ERS085356 | wzy  | O116     | NC    | NA       | NA      |                     |             | NA         | NC     |
| ERS085357 | wzx  | O128     | O128  | 100      | 132.409 | 3snp                |             | 0.208      | O128   |
| ERS085357 | wzy  | O128     | O128  | 100      | 123.338 | 3snp                |             | 0.287      | O128   |
| ERS085360 | wzx  | O84      | O84   | 100      | 135.411 | 1snp                |             | 0.072      | O84    |
| ERS085360 | wzy  | O84      | O84   | 100      | 116.192 | 1snp                |             | 0.087      | O84    |
| ERS085361 | wzx  | O55      | O55   | 100      | 122.443 |                     |             | 0          | O55    |
| ERS085361 | wzy  | O55      | O55   | 100      | 121.221 |                     |             | 0          | O55    |
| ERS085363 | wzx  | O71      | O71   | 100      | 173.924 |                     |             | 0          | O71    |
| ERS085363 | wzy  | O71      | O71   | 100      | 161.957 |                     |             | 0          | O71    |
| ERS085364 | wzx  | O88      | O88   | 100      | 96.795  |                     |             | 0          | O88    |
| ERS085364 | wzy  | O88      | O88   | 100      | 97.726  | 1snp                |             | 0.078      | O88    |
| ERS085365 | wzx  | O80      | O80   | 100      | 189.065 |                     |             | 0          | O80    |
| ERS085365 | wzy  | O80      | O80   | 100      | 193.123 |                     |             | 0          | O80    |
| ERS085366 | wzx  | O84      | O84   | 100      | 166.837 | 1snp                |             | 0.072      | O84    |
| ERS085366 | wzy  | O84      | O84   | 100      | 149.542 | 1snp                |             | 0.087      | O84    |
| ERS085367 | wzx  | O161     | O161  | 100      | 105.712 |                     |             | 0          | O161   |
| ERS085367 | wzy  | O161     | O161  | 99.747   | 109.469 | 2snp6indel          |             | 0.168      | O161   |

**Supplementary Table 3: Serotyping results for 144 EPEC isolates with a serologically determined O-group**

| Isolate   | Gene | Reported | SRST2 | Coverage | Depth   | Diffs      | Uncertainty | Divergence | BLAST+ |
|-----------|------|----------|-------|----------|---------|------------|-------------|------------|--------|
| ERS085368 | wzx  | O71      | O71   | 100      | 142.809 |            |             | 0          | O71    |
| ERS085368 | wzy  | O71      | O71   | 100      | 150.859 |            |             | 0          | O71    |
| ERS085369 | wzx  | O85      | O85   | 100      | 82.267  | 1snp       |             | 0.082      | O85    |
| ERS085369 | wzy  | O85      | O85   | 100      | 88.481  | 2snp       |             | 0.179      | O85    |
| ERS085370 | wzx  | O88      | O88   | 100      | 125.925 |            |             | 0          | O88    |
| ERS085370 | wzy  | O88      | O88   | 100      | 129.744 | 1snp       |             | 0.078      | O88    |
| ERS085371 | wzx  | O114     | O114  | 100      | 141.433 | 1snp       |             | 0.08       | O114   |
| ERS085371 | wzy  | O114     | O114  | 99.775   | 142.368 | 2snp3indel |             | 0.15       | O114   |
| ERS085373 | wzx  | O71      | O71   | 100      | 117.675 |            |             | 0          | O71    |
| ERS085373 | wzy  | O71      | O71   | 100      | 113.902 |            |             | 0          | O71    |
| ERS085377 | wzx  | O126     | O126  | 100      | 130.18  | 1snp       |             | 0.067      | O126   |
| ERS085377 | wzy  | O126     | O126  | 100      | 139.019 | 1snp       |             | 0.096      | O126   |
| ERS085379 | wzx  | O128     | O114  | 100      | 130.754 | 1snp       |             | 0.08       | O114   |
| ERS085379 | wzy  | O128     | O114  | 99.775   | 140.465 | 2snp3indel |             | 0.15       | NC     |
| ERS085380 | wzx  | O88      | O88   | 100      | 170.237 |            |             | 0          | O88    |
| ERS085380 | wzy  | O88      | O88   | 100      | 174.298 |            |             | 0          | O88    |
| ERS085382 | wzx  | O45      | O45   | 100      | 93.052  |            |             | 0          | O45    |
| ERS085382 | wzy  | O45      | O45   | 100      | 102.568 |            |             | 0          | O45    |
| ERS085383 | wzx  | O55      | O55   | 100      | 100.345 |            |             | 0          | O55    |
| ERS085383 | wzy  | O55      | O55   | 100      | 80.845  | 1snp       |             | 0.102      | O55    |
| ERS085384 | wzm  | O101     | O162  | 100      | 116.233 |            |             | 0          | O162   |
| ERS085384 | wzt  | O101     | O101  | 100      | 128.821 |            |             | 0          | O101   |
| ERS085385 | wzx  | O88      | O88   | 100      | 81.11   |            |             | 0          | O88    |
| ERS085385 | wzy  | O88      | O88   | 99.922   | 83.011  | 1indel     |             | 0          | O88    |
| ERS085386 | wzx  | O108     | O108  | 100      | 103.406 | 2snp       |             | 0.166      | O108   |
| ERS085386 | wzy  | O108     | O108  | 100      | 89.405  | 1snp       |             | 0.081      | O108   |
| ERS085389 | wzm  | O162     | O101  | 100      | 77.932  |            |             | 0          | O101   |
| ERS085389 | wzt  | O162     | O101  | 100      | 75.2    |            |             | 0          | O101   |

**Supplementary Table 3: Serotyping results for 144 EPEC isolates with a serologically determined O-group**

| Isolate   | Gene | Reported    | SRST2 | Coverage | Depth   | Diffs      | Uncertainty | Divergence | BLAST+ |
|-----------|------|-------------|-------|----------|---------|------------|-------------|------------|--------|
| ERS085391 | wzx  | O33 related | O33   | 100      | 84.819  |            |             | 0          | O33    |
| ERS085391 | wzy  | O33 related | O33   | 100      | 98.831  |            |             | 0          | O33    |
| ERS085392 | wzx  | O123        | O123  | 100      | 121.4   |            |             | 0          | O123   |
| ERS085392 | wzy  | O123        | O186  | 100      | 116.196 |            |             | 0          | O186   |
| ERS085393 | wzx  | O63         | O63   | 100      | 85.52   | 2snp       |             | 0.158      | O63    |
| ERS085393 | wzy  | O63         | O63   | 100      | 73.714  | 3snp       |             | 0.229      | O63    |
| ERS085395 | wzx  | O33 related | O33   | 100      | 73.259  |            |             | 0          | O33    |
| ERS085395 | wzy  | O33 related | O33   | 100      | 74.158  |            |             | 0          | O33    |
| ERS085396 | wzm  | O101        | O162  | 100      | 111.087 |            |             | 0          | O162   |
| ERS085396 | wzt  | O101        | O101  | 100      | 106.607 |            |             | 0          | O101   |
| ERS085397 | wzx  | O137        | O114  | 100      | 80.48   |            |             | 0          | O114   |
| ERS085397 | wzy  | O137        | O114  | 99.925   | 92.153  | 4snp1indel |             | 0.3        | O114   |
| ERS085398 | wzx  | O114        | O114  | 100      | 89.222  |            |             | 0          | O114   |
| ERS085398 | wzy  | O114        | O114  | 99.925   | 89.637  | 4snp1indel |             | 0.3        | O114   |
| ERS085399 | wzx  | O114        | O114  | 100      | 105.078 |            |             | 0          | O114   |
| ERS085399 | wzy  | O114        | O114  | 99.925   | 117.226 | 4snp1indel |             | 0.3        | O114   |
| ERS085400 | wzx  | O124        | NC    | NA       | NA      |            |             | NA         | NC     |
| ERS085400 | wzy  | O124        | NC    | NA       | NA      |            |             | NA         | NC     |
| ERS085401 | wzx  | O71         | O71   | 100      | 110.425 |            |             | 0          | O71    |
| ERS085401 | wzy  | O71         | O71   | 100      | 103.215 |            |             | 0          | O71    |
| ERS085402 | wzm  | O101        | O162  | 100      | 79.662  |            |             | 0          | O162   |
| ERS085402 | wzt  | O101        | O101  | 100      | 79.796  |            |             | 0          | O101   |
| ERS085403 | wzm  | O8          | O8    | 100      | 159.489 | 2snp       |             | 0.252      | O8     |
| ERS085403 | wzt  | O8          | O8    | 100      | 176.655 | 5snp       |             | 0.412      | O8     |
| ERS085404 | wzx  | O33         | O55   | 100      | 71.945  |            |             | 0          | O55    |
| ERS085404 | wzy  | O33         | O55   | 100      | 61.425  |            |             | 0          | O55    |
| ERS085405 | wzx  | O177        | O177  | 100      | 84.259  | 1snp       |             | 0.079      | O177   |
| ERS085405 | wzy  | O177        | O177  | 100      | 80.276  | 2snp       |             | 0.155      | O177   |

**Supplementary Table 3: Serotyping results for 144 EPEC isolates with a serologically determined O-group**

| Isolate   | Gene | Reported | SRST2 | Coverage | Depth   | Diffs | Uncertainty | Divergence | BLAST+ |
|-----------|------|----------|-------|----------|---------|-------|-------------|------------|--------|
| ERS085406 | wzx  | O55      | O33   | 100      | 95.3    |       |             | 0          | O33    |
| ERS085406 | wzy  | O55      | O33   | 100      | 111.178 |       |             | 0          | O33    |
| ERS085407 | wzx  | O171     | O171  | 100      | 94.443  | 1snp  |             | 0.079      | O171   |
| ERS085407 | wzy  | O171     | O171  | 100      | 104.074 | 1snp  |             | 0.087      | O171   |
| ERS085409 | wzx  | O51      | O51   | 100      | 171.801 | 25snp |             | 1.603      | O51    |
| ERS085409 | wzy  | O51      | O51   | 100      | 167.488 | 15snp |             | 1.445      | O51    |
| ERS085410 | wzx  | O45      | O45   | 100      | 119.45  |       |             | 0          | O45    |
| ERS085410 | wzy  | O45      | O45   | 100      | 120.542 |       |             | 0          | O45    |
| ERS085413 | wzx  | O82      | O82   | 100      | 132.968 | 1snp  |             | 0.081      | O82    |
| ERS085413 | wzy  | O82      | O82   | 100      | 128.09  | 1snp  |             | 0.092      | O82    |
| ERS085414 | wzx  | O123     | O123  | 100      | 91.091  |       |             | 0          | O123   |
| ERS085414 | wzy  | O123     | O186  | 100      | 93.73   |       |             | 0          | O186   |
| ERS085415 | wzx  | O45      | O45   | 100      | 84.781  |       |             | 0          | O45    |
| ERS085415 | wzy  | O45      | O45   | 100      | 92.248  |       |             | 0          | O45    |
| ERS085416 | wzx  | O45      | O45   | 100      | 139.063 |       |             | 0          | O45    |
| ERS085416 | wzy  | O45      | O45   | 100      | 150.374 |       |             | 0          | O45    |
| ERS085418 | wzx  | O82      | O82   | 100      | 110.738 |       |             | 0          | O82    |
| ERS085418 | wzy  | O82      | O82   | 100      | 94.282  | 1snp  |             | 0.092      | O82    |
| ERS085421 | wzx  | O2       | NC    | NA       | NA      |       |             | NA         | NC     |
| ERS085421 | wzy  | O2       | NC    | NA       | NA      |       |             | NA         | NC     |
| ERS085423 | wzx  | O2       | NC    | NA       | NA      |       |             | NA         | NC     |
| ERS085423 | wzy  | O2       | NC    | NA       | NA      |       |             | NA         | NC     |
| ERS085424 | wzx  | O33      | O33   | 100      | 84.906  |       |             | 0          | O33    |
| ERS085424 | wzy  | O33      | O33   | 100      | 101.594 |       |             | 0          | O33    |
| ERS085425 | wzx  | O165     | O165  | 100      | 125.298 |       |             | 0          | O165   |
| ERS085425 | wzy  | O165     | O165  | 100      | 102.211 |       |             | 0          | O165   |
| ERS085426 | wzx  | O104     | O104  | 100      | 108.892 |       |             | 0          | O104   |
| ERS085426 | wzy  | O104     | O104  | 100      | 82.603  | 4snp  |             | 0.359      | O104   |

**Supplementary Table 3: Serotyping results for 144 EPEC isolates with a serologically determined O-group**

| Isolate   | Gene | Reported | SRST2 | Coverage | Depth   | Diffs       | Uncertainty | Divergence | BLAST+ |
|-----------|------|----------|-------|----------|---------|-------------|-------------|------------|--------|
| ERS085427 | wzx  | O2       | NC    | NA       | NA      |             |             | NA         | NC     |
| ERS085427 | wzy  | O2       | NC    | NA       | NA      |             |             | NA         | NC     |
| ERS085428 | wzx  | O71      | O71   | 100      | 119.929 |             |             | 0          | O71    |
| ERS085428 | wzy  | O71      | O71   | 100      | 121.62  |             |             | 0          | O71    |
| ERS085429 | wzx  | O88      | O88   | 100      | 117.761 |             |             | 0          | O88    |
| ERS085429 | wzy  | O88      | O88   | 100      | 127.447 | 2snp        |             | 0.157      | O88    |
| ERS085434 | wzx  | O157     | O157  | 100      | 351.469 |             |             | 0          | O157   |
| ERS085434 | wzy  | O157     | O157  | 100      | 356.646 | 1snp        |             | 0.084      | O157   |
| ERS085435 | wzx  | O71      | O71   | 100      | 364.487 |             |             | 0          | O71    |
| ERS085435 | wzy  | O71      | O71   | 100      | 376.455 |             |             | 0          | O71    |
| ERS085436 | wzx  | O157     | O157  | 100      | 574.794 |             |             | 0          | O157   |
| ERS085436 | wzy  | O157     | O157  | 100      | 543.669 | 1snp        |             | 0.084      | O157   |
| ERS085437 | wzx  | O153     | O8    | 100      | 363.034 | 27snp       |             | 2.273      | O8     |
| ERS085437 | wzy  | O153     | O8    | 99.919   | 368.318 | 26snp2indel |             | 2.093      | O8     |
| ERS085438 | wzx  | O88      | O88   | 100      | 324.358 |             |             | 0          | O88    |
| ERS085438 | wzy  | O88      | O88   | 100      | 338.088 |             |             | 0          | O88    |
| ERS085439 | wzx  | O88      | O88   | 100      | 297.404 |             |             | 0          | O88    |
| ERS085439 | wzy  | O88      | O88   | 100      | 290.496 | 1snp        |             | 0.078      | O88    |
| ERS085441 | wzx  | O114     | O114  | 100      | 181.433 | 1snp        |             | 0.08       | O114   |
| ERS085441 | wzy  | O114     | O114  | 99.775   | 158.929 | 2snp3indel  |             | 0.15       | O114   |
| ERS139198 | wzx  | O131     | O131  | 100      | 46.559  | 3snp        |             | 0.236      | O131   |
| ERS139198 | wzy  | O131     | O131  | 100      | 45.989  |             |             | 0          | O131   |
| ERS139199 | wzm  | O101     | O162  | 100      | 71.665  |             |             | 0          | O162   |
| ERS139199 | wzt  | O101     | O101  | 100      | 62.135  |             |             | 0          | O101   |
| ERS139200 | wzx  | O57      | O38   | 100      | 94.866  | 4snp        |             | 0.306      | O38    |
| ERS139200 | wzy  | O57      | O38   | 99.919   | 89.559  | 5snp1indel  |             | 0.407      | O38    |
| ERS139201 | wzx  | O71      | O71   | 100      | 74.489  |             |             | 0          | O71    |
| ERS139201 | wzy  | O71      | O71   | 100      | 76.252  |             |             | 0          | O71    |

**Supplementary Table 3: Serotyping results for 144 EPEC isolates with a serologically determined O-group**

| Isolate   | Gene | Reported     | SRST2 | Coverage | Depth  | Diffs       | Uncertainty | Divergence | BLAST+ |
|-----------|------|--------------|-------|----------|--------|-------------|-------------|------------|--------|
| ERS139202 | wzx  | O160         | O160  | 100      | 65.863 | 4snp        |             | 0.321      | O160   |
| ERS139202 | wzy  | O160         | O160  | 100      | 66.193 | 5snp        |             | 0.454      | O160   |
| ERS139203 | wzx  | O160         | O160  | 100      | 65.914 | 4snp        |             | 0.321      | O160   |
| ERS139203 | wzy  | O160         | O160  | 100      | 64.546 | 5snp        |             | 0.454      | O160   |
| ERS139205 | wzx  | O103 related | O103  | 100      | 87.824 | 2snp        |             | 0.158      | O103   |
| ERS139205 | wzy  | O103 related | O103  | 100      | 93.853 | 1snp        |             | 0.087      | O103   |
| ERS139207 | wzx  | O71          | O71   | 100      | 61.414 | 4snp        |             | 0.314      | O71    |
| ERS139207 | wzy  | O71          | O71   | 100      | 56.909 | 6snp        |             | 0.465      | O71    |
| ERS139209 | wzx  | O88          | O88   | 100      | 67.546 |             |             | 0          | O88    |
| ERS139209 | wzy  | O88          | O88   | 100      | 64.71  | 1snp        |             | 0.078      | O88    |
| ERS139211 | wzx  | O61          | O61   | 100      | 63.755 |             |             | 0          | O61    |
| ERS139211 | wzy  | O61          | O61   | 100      | 64.548 | 1snp        |             | 0.086      | O61    |
| ERS139214 | wzx  | O153         | O8    | 100      | 33.144 | 28snp       |             | 2.357      | O8     |
| ERS139214 | wzy  | O153         | O8    | 100      | 37.183 | 27snp2indel |             | 2.174      | O8     |
| ERS139217 | wzx  | O88          | O88   | 100      | 77.126 |             |             | 0          | O88    |
| ERS139217 | wzy  | O88          | O88   | 100      | 75.905 | 1snp        |             | 0.078      | O88    |
| ERS139218 | wzm  | O8           | O8    | 100      | 40.244 | 2snp        |             | 0.252      | O8     |
| ERS139218 | wzt  | O8           | O8    | 100      | 55.521 | 5snp        |             | 0.412      | O8     |
| ERS139221 | wzx  | O101         | O88   | 100      | 39.964 |             |             | 0          | O88    |
| ERS139221 | wzy  | O101         | O88   | 100      | 39.427 | 1snp        |             | 0.078      | O88    |
| ERS139222 | wzx  | O111         | O111  | 99.842   | 82.914 | 2holes      | edge0.0     | 0          | O111   |
| ERS139222 | wzy  | O111         | O111  | 100      | 83.139 | 1snp        |             | 0.095      | O111   |
| ERS139223 | wzm  | O88          | O162  | 100      | 85.424 |             |             | 0          | O162   |
| ERS139223 | wzt  | O88          | O101  | 100      | 74.106 |             |             | 0          | O101   |
| ERS139225 | wzx  | O88          | O88   | 100      | 46.978 |             |             | 0          | O88    |
| ERS139225 | wzy  | O88          | O88   | 100      | 50.15  | 1snp        |             | 0.078      | O88    |
| ERS139226 | wzx  | O55          | O55   | 99.922   | 27.74  | 1indel      |             | 0          | O55    |
| ERS139226 | wzy  | O55          | O55   | 100      | 28.609 |             |             | 0          | O55    |

**Supplementary Table 3: Serotyping results for 144 EPEC isolates with a serologically determined O-group**

| Isolate   | Gene | Reported    | SRST2 | Coverage | Depth   | Diffs | Uncertainty | Divergence | BLAST+ |
|-----------|------|-------------|-------|----------|---------|-------|-------------|------------|--------|
| ERS139227 | wzx  | O88         | O88   | 100      | 23.499  |       |             | 0          | O88    |
| ERS139227 | wzy  | O88         | O88   | 100      | 30.194  | 1snp  |             | 0.078      | O88    |
| ERS139228 | wzx  | O51         | O51   | 100      | 44.089  | 25snp |             | 1.603      | O51    |
| ERS139228 | wzy  | O51         | O51   | 100      | 40.676  | 15snp |             | 1.445      | O51    |
| ERS139229 | wzx  | O51         | O51   | 100      | 35.722  |       |             | 0          | O51    |
| ERS139229 | wzy  | O51         | O51   | 100      | 40.405  |       |             | 0          | O51    |
| ERS139230 | wzx  | O88         | O88   | 100      | 34.82   |       |             | 0          | O88    |
| ERS139230 | wzy  | O88         | O88   | 100      | 34.741  | 1snp  |             | 0.078      | O88    |
| ERS139231 | wzx  | O157        | O157  | 100      | 100.149 |       |             | 0          | O157   |
| ERS139231 | wzy  | O157        | O157  | 100      | 89.687  | 1snp  |             | 0.084      | O157   |
| ERS139232 | wzx  | O33         | O33   | 100      | 85.668  |       |             | 0          | O33    |
| ERS139232 | wzy  | O33         | O33   | 100      | 77.169  |       |             | 0          | O33    |
| ERS139233 | wzx  | O33         | O33   | 100      | 60.876  |       |             | 0          | O33    |
| ERS139233 | wzy  | O33         | O33   | 100      | 59.713  |       |             | 0          | O33    |
| ERS139234 | wzx  | O26         | O26   | 100      | 41.118  |       |             | 0          | O26    |
| ERS139234 | wzy  | O26         | O26   | 100      | 49.239  |       |             | 0          | O26    |
| ERS139235 | wzm  | O128        | O8    | 100      | 53.283  | 2snp  |             | 0.252      | O8     |
| ERS139235 | wzt  | O128        | O8    | 100      | 55.052  | 5snp  |             | 0.412      | O8     |
| ERS139236 | wzx  | O128        | O128  | 100      | 38.141  | 5snp  |             | 0.347      | O128   |
| ERS139236 | wzy  | O128        | O128  | 100      | 38.345  | 3snp  |             | 0.287      | O128   |
| ERS139239 | wzx  | O21         | O21   | 100      | 56.879  |       |             | 0          | O21    |
| ERS139239 | wzy  | O21         | O21   | 100      | 57.756  |       |             | 0          | O21    |
| ERS139241 | wzx  | O88         | O88   | 100      | 41.772  |       |             | 0          | O88    |
| ERS139241 | wzy  | O88         | O88   | 100      | 39.458  | 1snp  |             | 0.078      | O88    |
| ERS139243 | wzx  | O88 related | O88   | 100      | 46.203  | 1snp  |             | 0.069      | O88    |
| ERS139243 | wzy  | O88 related | O88   | 100      | 43.503  |       |             | 0          | O88    |
| ERS139244 | wzx  | O88         | O88   | 100      | 55.416  |       |             | 0          | O88    |
| ERS139244 | wzy  | O88         | O88   | 100      | 61.061  | 1snp  |             | 0.078      | O88    |



**Supplementary Table 3: Serotyping results for 144 EPEC isolates with a serologically determined O-group**

| Isolate   | Gene       | Reported | SRST2 | Coverage | Depth  | Diffs   | Uncertainty | Divergence | BLAST+ |
|-----------|------------|----------|-------|----------|--------|---------|-------------|------------|--------|
| ERS139247 | <i>wzm</i> | O8       | O8    | 100      | 46.715 | 2snp    |             | 0.252      | O8     |
| ERS139247 | <i>wzt</i> | O8       | O8    | 100      | 56.016 | 5snp    |             | 0.412      | O8     |
| ERS139248 | <i>wzx</i> | O153     | O178  | 100      | 36.47  |         |             | 0          | O178   |
| ERS139248 | <i>wzy</i> | O153     | O178  | 100      | 36.591 | trun    |             | 0          | O178   |
| ERS139249 | <i>wzx</i> | O51      | O51   | 100      | 37.165 |         |             | 0          | O51    |
| ERS139249 | <i>wzy</i> | O51      | O51   | 100      | 33.913 |         |             | 0          | O51    |
| ERS139251 | <i>wzx</i> | O33      | O33   | 100      | 32.823 |         |             | 0          | O33    |
| ERS139251 | <i>wzy</i> | O33      | O33   | 100      | 25.849 |         |             | 0          | O33    |
| ERS139252 | <i>wzx</i> | O157     | O157  | 100      | 48.776 |         |             | 0          | O157   |
| ERS139252 | <i>wzy</i> | O157     | O157  | 100      | 47.832 | 1snp    |             | 0.084      | O157   |
| ERS139253 | <i>wzx</i> | O33      | O33   | 100      | 29.705 |         |             | 0          | O33    |
| ERS139253 | <i>wzy</i> | O33      | O33   | 100      | 34.061 |         |             | 0          | O33    |
| ERS139254 | <i>wzx</i> | O45      | O45   | 100      | 30.064 |         |             | 0          | O45    |
| ERS139254 | <i>wzy</i> | O45      | O45   | 100      | 32.091 |         |             | 0          | O45    |
| ERS139255 | <i>wzx</i> | O88      | O88   | 100      | 26.664 |         |             | 0          | O88    |
| ERS139255 | <i>wzy</i> | O88      | O88   | 100      | 30.75  |         |             | 0          | O88    |
| ERS139256 | <i>wzx</i> | O103     | O88   | 96.433   | 1.848  | 52holes | edge0.0     | 0          | O103   |
| ERS139256 | <i>wzy</i> | O103     | O103  | 100      | 64.73  | 3snp    |             | 0.261      | O103   |
| ERS139258 | <i>wzx</i> | O71      | O71   | 100      | 51.35  |         |             | 0          | O71    |
| ERS139258 | <i>wzy</i> | O71      | O71   | 100      | 61.423 |         |             | 0          | O71    |
| ERS139262 | <i>wzx</i> | O109     | O109  | 100      | 29.755 | 3snp    |             | 0.22       | O109   |
| ERS139262 | <i>wzy</i> | O109     | O109  | 100      | 34.03  | 4snp    |             | 0.328      | O109   |
| ERS139263 | <i>wzm</i> | O8       | O8    | 100      | 32.877 | 2snp    |             | 0.252      | O8     |
| ERS139263 | <i>wzt</i> | O8       | O8    | 100      | 33.834 | 5snp    |             | 0.412      | O8     |
| ERS139264 | <i>wzx</i> | O82      | O82   | 100      | 57.328 |         |             | 0          | O82    |
| ERS139264 | <i>wzy</i> | O82      | O82   | 100      | 50.77  |         |             | 0          | O82    |
| ERS139265 | <i>wzx</i> | O153     | NC    | NA       | NA     |         |             | NA         | NC     |
| ERS139265 | <i>wzy</i> | O153     | NC    | NA       | NA     |         |             | NA         | NC     |

**Supplementary Table 3: Serotyping results for 144 EPEC isolates with a serologically determined O-group**

| Isolate   | Gene | Reported | SRST2 | Coverage | Depth  | Diffs              | Uncertainty | Divergence | BLAST+ |
|-----------|------|----------|-------|----------|--------|--------------------|-------------|------------|--------|
| ERS139266 | wzx  | O108     | O108  | 100      | 69.731 |                    |             | 0          | O108   |
| ERS139266 | wzy  | O108     | O108  | 100      | 69.748 | 1snp               |             | 0.081      | O108   |
| ERS139268 | wzx  | O146     | O146  | 100      | 39.058 |                    |             | 0          | O146   |
| ERS139268 | wzy  | O146     | O146  | 100      | 35.492 |                    |             | 0          | O146   |
| ERS139272 | wzm  | O8       | O8    | 100      | 33.407 | 2snp               |             | 0.252      | O8     |
| ERS139272 | wzt  | O8       | O8    | 100      | 41.621 | 5snp               |             | 0.412      | O8     |
| ERS139273 | wzx  | O88      | O88   | 100      | 68.782 |                    |             | 0          | O88    |
| ERS139273 | wzy  | O88      | O88   | 100      | 61.943 | 1snp               |             | 0.078      | O88    |
| ERS139274 | wzx  | O111     | O111  | 99.842   | 69.857 | 2holes             | edge0.0     | 0          | O111   |
| ERS139274 | wzy  | O111     | O111  | 100      | 67.549 | 1snp               |             | 0.095      | O111   |
| ERS139276 | wzx  | O103     | O103  | 100      | 61.95  | 1snp               |             | 0.079      | O103   |
| ERS139276 | wzy  | O103     | O103  | 100      | 51.525 | 3snp               |             | 0.261      | O103   |
| ERS139277 | wzx  | O128     | O128  | 100      | 70.758 | 3snp               |             | 0.208      | O128   |
| ERS139277 | wzy  | O128     | O128  | 100      | 66.856 | 3snp               |             | 0.287      | O128   |
| ERS139278 | wzx  | O80      | O80   | 100      | 34.913 |                    |             | 0          | O80    |
| ERS139278 | wzy  | O80      | O80   | 100      | 34.86  |                    |             | 0          | O80    |
| ERS150871 | wzm  | O162     | O162  | 100      | 97.968 |                    |             | 0          | O162   |
| ERS150871 | wzt  | O162     | O101  | 100      | 85.523 |                    |             | 0          | O101   |
| ERS150876 | wzx  | O177     | O177  | 100      | 44.159 | 1snp               |             | 0.079      | O177   |
| ERS150876 | wzy  | O177     | O177  | 100      | 51.03  | 2snp               |             | 0.155      | O177   |
| ERS150879 | wzx  | O114     | O114  | 100      | 94.324 |                    |             | 0          | O114   |
| ERS150879 | wzy  | O114     | O25   | 95.104   | 2.236  | 44snp1indel52holes | edge1.0     | 4.356      | O114   |
| ERS150882 | wzx  | O153     | O8    | 100      | 69.525 | 27snp              |             | 2.273      | O8     |
| ERS150882 | wzy  | O153     | O8    | 100      | 67.056 | 27snp1indel        |             | 2.174      | O8     |
| ERS150883 | wzx  | O103     | O103  | 100      | 76.353 | 2snp               |             | 0.158      | O103   |
| ERS150883 | wzy  | O103     | O103  | 100      | 76.555 | 1snp               |             | 0.087      | O103   |
| ERS150902 | wzx  | O108     | NC    | NA       | NA     |                    |             | NA         | NC     |
| ERS150902 | wzy  | O108     | NC    | NA       | NA     |                    |             | NA         | NC     |

**Supplementary Table 3: Serotyping results for 144 EPEC isolates with a serologically determined O-group**

| Isolate   | Gene | Reported    | SRST2 | Coverage | Depth  | Diffs       | Uncertainty | Divergence | BLAST+ |
|-----------|------|-------------|-------|----------|--------|-------------|-------------|------------|--------|
| ERS150905 | wzx  | O55         | O55   | 100      | 44.542 | 18snp       |             | 1.408      | O55    |
| ERS150905 | wzy  | O55         | O55   | 100      | 37.443 | 22snp       |             | 2.249      | O55    |
| ERS150906 | wzx  | O153        | O8    | 100      | 97.331 | 27snp       |             | 2.273      | O8     |
| ERS150906 | wzy  | O153        | O8    | 100      | 98.554 | 27snp1indel |             | 2.174      | O8     |
| ERS150986 | wzx  | O33 related | O33   | 100      | 49.852 |             |             | 0          | O33    |
| ERS150986 | wzy  | O33 related | O33   | 100      | 46.057 |             |             | 0          | O33    |
| ERS150987 | wzx  | O88         | O88   | 100      | 67.388 |             |             | 0          | O88    |
| ERS150987 | wzy  | O88         | O88   | 100      | 62.401 | 1snp        |             | 0.078      | O88    |

NC = No in silico call was made

NA = Not available

Coverage = percentage of the gene length that was covered

Depth = mean read depth across the length of all alleles which were assigned a top scoring allele number

Diffs = differences between the detected allele and the best scoring allele.

Uncertainty = details of parts of the top scoring alleles for which the depth of coverage was too low to give confidence in the result

Divergence = divergence of allele detected to sequence database (ran with option to report <10% divergence)

Reported =reported phenotype of the isolate

SRST2 = call from short read data and the EcOH database

BLAST+ = call from BLAST analysis of Velvet assemblies and the EcOH database

**Supplementary Table 4: Serotyping results for 128 EPEC isolates with a serologically determined H-type**

| Isolate   | Gene        | Reported | SRST2 | Coverage | Depth   | Diffs      | Uncertainty | Divergence | BLAST+ |
|-----------|-------------|----------|-------|----------|---------|------------|-------------|------------|--------|
| ERR137822 | <i>fliC</i> | H9       | H9    | 100      | 114.419 | 24snp      |             | 1.192      | H9     |
| ERS085336 | <i>fliC</i> | H6       | H6    | 100      | 173.978 | 6snp       |             | 0.364      | H6     |
| ERS085337 | <i>fliC</i> | H19      | H19   | 99.945   | 207.113 | 1snp1holes |             | 0.055      | H19    |
| ERS085338 | <i>fliC</i> | H19      | H19   | 99.945   | 163.106 | 1snp1holes |             | 0.055      | H19    |
| ERS085339 | <i>fliC</i> | H21      | H21   | 100      | 160.369 |            |             | 0          | H21    |
| ERS085340 | <i>fliC</i> | H34      | H34   | 100      | 108.13  | 10snp      |             | 0.611      | H34    |
| ERS085344 | <i>fliC</i> | H6       | H9    | 100      | 140.062 | 24snp      |             | 1.192      | H9     |
| ERS085346 | <i>fliC</i> | H51      | H51   | 100      | 113.062 |            |             | 0          | H51    |
| ERS085347 | <i>fliC</i> | H33      | H33   | 100      | 178.785 |            |             | 0          | H33    |
| ERS085348 | <i>fliC</i> | H33      | H40   | 100      | 170.619 |            |             | 0          | H40    |
| ERS085349 | <i>fliC</i> | H33      | H33   | 100      | 208.251 |            |             | 0          | H33    |
| ERS085351 | <i>fliC</i> | H19      | H19   | 99.945   | 112.3   | 1snp1holes |             | 0.055      | H19    |
| ERS085352 | <i>fliC</i> | H21      | H21   | 100      | 119.367 |            |             | 0          | H21    |
| ERS085353 | <i>fliC</i> | H6       | H6    | 100      | 110.337 | 8snp       |             | 0.486      | H6     |
| ERS085354 | <i>fliC</i> | H21      | H21   | 100      | 132.103 |            |             | 0          | H21    |
| ERS085356 | <i>fliC</i> | H9       | H9    | 100      | 215.2   | 24snp      |             | 1.192      | H9     |
| ERS085357 | <i>fliC</i> | H8       | H8    | 100      | 158.268 | 1snp       |             | 0.068      | H8     |
| ERS085358 | <i>fliC</i> | H51      | H51   | 100      | 126.42  | 18snp      |             | 0.99       | H51    |
| ERS085360 | <i>fliC</i> | H14      | H14   | 100      | 125.137 | 19snp      |             | 1.149      | H14    |
| ERS085362 | <i>fliC</i> | H21      | H21   | 100      | 148.133 | 20snp      |             | 1.449      | H21    |
| ERS085363 | <i>fliC</i> | H19      | H19   | 99.945   | 157.474 | 1snp1holes |             | 0.055      | H19    |
| ERS085365 | <i>fliC</i> | H2       | H2    | 100      | 183.736 | 12snp      |             | 0.803      | H2     |
| ERS085367 | <i>fliC</i> | H21      | H21   | 100      | 109.038 | 20snp      |             | 1.449      | H21    |
| ERS085368 | <i>fliC</i> | H19      | H19   | 99.945   | 134.475 | 1snp1holes |             | 0.055      | H19    |
| ERS085369 | <i>fliC</i> | H31      | H31   | 100      | 111.102 | 57snp      |             | 3.417      | H31    |
| ERS085370 | <i>fliC</i> | H25      | H25   | 100      | 108.609 | 9snp       |             | 0.752      | H25    |
| ERS085371 | <i>fliC</i> | H2       | H2    | 100      | 124.914 |            |             | 0          | H2     |
| ERS085372 | <i>fliC</i> | H21      | H21   | 100      | 142.293 | 20snp      |             | 1.449      | H21    |

**Supplementary Table 4: Serotyping results for 128 EPEC isolates with a serologically determined H-type**

| Isolate   | Gene        | Reported | SRST2 | Coverage | Depth   | Diffs      | Uncertainty | Divergence | BLAST+ |
|-----------|-------------|----------|-------|----------|---------|------------|-------------|------------|--------|
| ERS085373 | <i>fliC</i> | H19      | H19   | 99.945   | 101.517 | 1snp1holes |             | 0.055      | H19    |
| ERS085374 | <i>fliC</i> | H21      | H21   | 100      | 95.861  | 20snp      |             | 1.449      | H21    |
| ERS085375 | <i>fliC</i> | H40      | H40   | 100      | 123.574 |            |             | 0          | H40    |
| ERS085376 | <i>fliC</i> | H40      | H40   | 100      | 137.395 |            |             | 0          | H40    |
| ERS085379 | <i>fliC</i> | H2       | H2    | 100      | 127.609 |            |             | 0          | H2     |
| ERS085380 | <i>fliC</i> | H25      | H25   | 100      | 156.99  | 9snp       |             | 0.752      | H25    |
| ERS085385 | <i>fliC</i> | H25      | H25   | 100      | 77.449  | 9snp       |             | 0.752      | H25    |
| ERS085386 | <i>fliC</i> | H9       | H9    | 100      | 97.948  | 29snp      |             | 1.441      | H9     |
| ERS085387 | <i>fliC</i> | H40      | H40   | 100      | 84.296  |            |             | 0          | H40    |
| ERS085389 | <i>fliC</i> | H33      | H33   | 100      | 93.409  |            |             | 0          | H33    |
| ERS085390 | <i>fliC</i> | H4       | H4    | 100      | 87.688  | 1snp       |             | 0.095      | NC     |
| ERS085391 | <i>fliC</i> | H6       | H6    | 100      | 104.914 | 7snp       |             | 0.425      | NC     |
| ERS085393 | <i>fliC</i> | H6       | H6    | 100      | 117.772 | 8snp       |             | 0.486      | H6     |
| ERS085394 | <i>fliC</i> | H21      | H21   | 100      | 106.933 |            |             | 0          | H21    |
| ERS085397 | <i>fliC</i> | H6       | H2    | 100      | 106.635 |            |             | 0          | H2     |
| ERS085400 | <i>fliC</i> | H2       | H2    | 100      | 172.988 | 12snp      |             | 0.803      | H2     |
| ERS085401 | <i>fliC</i> | H19      | H19   | 99.945   | 126.692 | 1snp1holes |             | 0.055      | H19    |
| ERS085403 | <i>fliC</i> | H19      | H19   | 99.945   | 186.835 | 1snp1holes |             | 0.055      | H19    |
| ERS085405 | <i>fliC</i> | H9       | H9    | 100      | 84.758  | 29snp      |             | 1.441      | H9     |
| ERS085407 | <i>fliC</i> | H19      | H19   | 99.945   | 123.681 | 1snp1holes |             | 0.055      | H19    |
| ERS085408 | <i>fliC</i> | H40      | H40   | 100      | 141.429 |            |             | 0          | H40    |
| ERS085409 | <i>fliC</i> | H40      | H40   | 100      | 170.563 |            |             | 0          | H40    |
| ERS085412 | <i>fliC</i> | H21      | H21   | 100      | 145.696 |            |             | 0          | H21    |
| ERS085414 | <i>fliC</i> | H19      | H19   | 99.945   | 105.247 | 1snp1holes |             | 0.055      | H19    |
| ERS085417 | <i>fliC</i> | H40      | H40   | 100      | 110.286 |            |             | 0          | H40    |
| ERS085419 | <i>fliC</i> | H40      | H40   | 100      | 134.646 |            |             | 0          | H40    |
| ERS085420 | <i>fliC</i> | H40      | H40   | 100      | 104.118 |            |             | 0          | H40    |
| ERS085423 | <i>fliC</i> | H40      | H40   | 100      | 148     |            |             | 0          | H40    |

**Supplementary Table 4: Serotyping results for 128 EPEC isolates with a serologically determined H-type**

| Isolate   | Gene        | Reported | SRST2 | Coverage | Depth   | Diffs      | Uncertainty | Divergence | BLAST+ |
|-----------|-------------|----------|-------|----------|---------|------------|-------------|------------|--------|
| ERS085425 | <i>fliC</i> | H9       | H9    | 100      | 128.043 | 24snp      |             | 1.192      | H9     |
| ERS085426 | <i>fliC</i> | H7       | H7    | 100      | 120.367 |            |             | 0          | H7     |
| ERS085428 | <i>fliC</i> | H19      | H19   | 99.945   | 126.366 | 1snp1holes |             | 0.055      | H19    |
| ERS085429 | <i>fliC</i> | H25      | H25   | 100      | 126.467 | 9snp       |             | 0.752      | H25    |
| ERS085430 | <i>fliC</i> | H2       | H2    | 100      | 240.047 |            |             | 0          | H2     |
| ERS085432 | <i>fliC</i> | H40      | H40   | 100      | 398.368 |            |             | 0          | H40    |
| ERS085435 | <i>fliC</i> | H40      | H40   | 100      | 387.068 |            |             | 0          | H40    |
| ERS085438 | <i>fliC</i> | H25      | H25   | 100      | 327.584 | 9snp       |             | 0.752      | H25    |
| ERS085439 | <i>fliC</i> | H25      | H25   | 99.916   | 318.988 | 8snp1indel |             | 0.668      | H25    |
| ERS085441 | <i>fliC</i> | H2       | H2    | 100      | 306.997 |            |             | 0          | H2     |
| ERS139198 | <i>fliC</i> | H31      | H31   | 100      | 38.851  | 57snp      |             | 3.417      | H31    |
| ERS139200 | <i>fliC</i> | H19      | H19   | 99.945   | 78.876  | 1snp1holes |             | 0.055      | H19    |
| ERS139201 | <i>fliC</i> | H19      | H19   | 99.945   | 70.117  | 1snp1holes |             | 0.055      | H19    |
| ERS139202 | <i>fliC</i> | H19      | H19   | 99.945   | 55.277  | 1snp1holes |             | 0.055      | H19    |
| ERS139203 | <i>fliC</i> | H19      | H19   | 99.945   | 55.449  | 1snp1holes |             | 0.055      | H19    |
| ERS139204 | <i>fliC</i> | H21      | H21   | 100      | 79.899  |            |             | 0          | H21    |
| ERS139205 | <i>fliC</i> | H2       | H2    | 100      | 82.368  |            |             | 0          | H2     |
| ERS139206 | <i>fliC</i> | H33      | H33   | 100      | 38.133  |            |             | 0          | H33    |
| ERS139209 | <i>fliC</i> | H25      | H25   | 100      | 61.726  | 9snp       |             | 0.752      | H25    |
| ERS139216 | <i>fliC</i> | H6       | H9    | 100      | 57.168  | 37snp      |             | 1.838      | H9     |
| ERS139217 | <i>fliC</i> | H25      | H25   | 100      | 63.371  | 9snp       |             | 0.752      | H25    |
| ERS139218 | <i>fliC</i> | H19      | H19   | 99.945   | 50.072  | 1snp1holes |             | 0.055      | H19    |
| ERS139219 | <i>fliC</i> | H19      | H2    | 100      | 95.907  |            |             | 0          | H2     |
| ERS139223 | <i>fliC</i> | H25      | H33   | 100      | 80.138  |            |             | 0          | H33    |
| ERS139224 | <i>fliC</i> | H21      | H21   | 100      | 53.241  |            |             | 0          | H21    |
| ERS139225 | <i>fliC</i> | H25      | H25   | 100      | 44.457  | 9snp       |             | 0.752      | H25    |
| ERS139227 | <i>fliC</i> | H25      | H25   | 100      | 29.315  | 9snp       |             | 0.752      | H25    |
| ERS139228 | <i>fliC</i> | H40      | H40   | 100      | 37.992  |            |             | 0          | H40    |

**Supplementary Table 4: Serotyping results for 128 EPEC isolates with a serologically determined H-type**

| Isolate   | Gene        | Reported | SRST2 | Coverage | Depth  | Diffs       | Uncertainty | Divergence | BLAST+ |
|-----------|-------------|----------|-------|----------|--------|-------------|-------------|------------|--------|
| ERS139229 | <i>fliC</i> | H7       | H7    | 100      | 34.308 |             |             | 0          | H7     |
| ERS139230 | <i>fliC</i> | H25      | H25   | 100      | 31.622 | 9snp        |             | 0.752      | H25    |
| ERS139233 | <i>fliC</i> | H6       | H6    | 100      | 55.582 | 7snp        |             | 0.425      | NC     |
| ERS139234 | <i>fliC</i> | H11      | H11   | 100      | 45.769 |             |             | 0          | H11    |
| ERS139235 | <i>fliC</i> | H2       | H19   | 99.945   | 55.682 | 1snp1holes  |             | 0.055      | H19    |
| ERS139236 | <i>fliC</i> | H2       | H2    | 100      | 35.768 |             |             | 0          | H2     |
| ERS139238 | <i>fliC</i> | H5       | H5    | 99.924   | 49.68  | 2snp1holes  |             | 0.153      | H5     |
| ERS139240 | <i>fliC</i> | H6       | H6    | 100      | 68.671 | 6snp        |             | 0.364      | H6     |
| ERS139241 | <i>fliC</i> | H4       | H40   | 93.78    | 3.176  | 6snp92holes | edge1.0     | 0.433      | NC     |
| ERS139242 | <i>fliC</i> | H40      | H40   | 100      | 61.721 |             |             | 0          | H40    |
| ERS139243 | <i>fliC</i> | H25      | H25   | 100      | 44.645 | 9snp        |             | 0.752      | H25    |
| ERS139244 | <i>fliC</i> | H25      | H25   | 100      | 54.93  | 9snp        |             | 0.752      | H25    |
| ERS139247 | <i>fliC</i> | H19      | H19   | 99.945   | 55.241 | 1snp1holes  |             | 0.055      | H19    |
| ERS139248 | <i>fliC</i> | H6       | H7    | 100      | 34.656 | 1snp        |             | 0.057      | H7     |
| ERS139249 | <i>fliC</i> | H7       | H7    | 100      | 35.269 |             |             | 0          | H7     |
| ERS139250 | <i>fliC</i> | H40      | H40   | 100      | 38.836 |             |             | 0          | H40    |
| ERS139251 | <i>fliC</i> | H6       | H6    | 100      | 33.115 | 7snp        |             | 0.425      | NC     |
| ERS139253 | <i>fliC</i> | H6       | H6    | 100      | 29.189 | 7snp        |             | 0.425      | NC     |
| ERS139255 | <i>fliC</i> | H25      | H25   | 100      | 29.05  | 9snp        |             | 0.752      | H25    |
| ERS139258 | <i>fliC</i> | H19      | H19   | 99.945   | 49.813 | 1snp1holes  |             | 0.055      | H19    |
| ERS139259 | <i>fliC</i> | H6       | H6    | 100      | 44.882 | 7snp        |             | 0.425      | NC     |
| ERS139260 | <i>fliC</i> | H5       | H5    | 99.924   | 52.611 | 2snp1holes  |             | 0.153      | H5     |
| ERS139262 | <i>fliC</i> | H21      | H21   | 100      | 31.652 |             |             | 0          | H21    |
| ERS139263 | <i>fliC</i> | H19      | H19   | 99.945   | 40.015 | 1snp1holes  |             | 0.055      | H19    |
| ERS139265 | <i>fliC</i> | H19      | H19   | 99.945   | 53.035 | 1snp1holes  |             | 0.055      | H19    |
| ERS139266 | <i>fliC</i> | H21      | H21   | 100      | 64.765 |             |             | 0          | H21    |
| ERS139267 | <i>fliC</i> | H40      | H40   | 100      | 75.001 |             |             | 0          | H40    |
| ERS139268 | <i>fliC</i> | H21      | H21   | 100      | 38.091 |             |             | 0          | H21    |

**Supplementary Table 4: Serotyping results for 128 EPEC isolates with a serologically determined H-type**

| Isolate   | Gene        | Reported | SRST2 | Coverage | Depth  | Diffs      | Uncertainty | Divergence | BLAST+ |
|-----------|-------------|----------|-------|----------|--------|------------|-------------|------------|--------|
| ERS139269 | <i>fliC</i> | H21      | H21   | 100      | 63.781 | 20snp      |             | 1.449      | H21    |
| ERS139271 | <i>fliC</i> | H7       | H7    | 100      | 69.198 |            |             | 0          | H7     |
| ERS139272 | <i>fliC</i> | H19      | H19   | 99.945   | 38.592 | 1snp1holes |             | 0.055      | H19    |
| ERS139273 | <i>fliC</i> | H25      | H25   | 100      | 59.432 | 9snp       |             | 0.752      | H25    |
| ERS139274 | <i>fliC</i> | H19      | H19   | 99.945   | 64.004 | 1snp1holes |             | 0.055      | H19    |
| ERS139275 | <i>fliC</i> | H5       | H5    | 99.924   | 33.633 | 2snp1holes |             | 0.153      | H5     |
| ERS139277 | <i>fliC</i> | H8       | H8    | 100      | 65.095 | 1snp       |             | 0.068      | H8     |
| ERS150870 | <i>fliC</i> | H21      | H21   | 100      | 43.797 |            |             | 0          | H21    |
| ERS150873 | <i>fliC</i> | H5       | H5    | 99.924   | 77.59  | 2snp1holes |             | 0.153      | H5     |
| ERS150876 | <i>fliC</i> | H11      | H11   | 100      | 44.584 |            |             | 0          | H11    |
| ERS150880 | <i>fliC</i> | H6       | H6    | 100      | 69.189 | 7snp       |             | 0.425      | NC     |
| ERS150902 | <i>fliC</i> | H21      | H21   | 100      | 72.473 |            |             | 0          | H21    |
| ERS150903 | <i>fliC</i> | H21      | H21   | 100      | 77.35  |            |             | 0          | H21    |
| ERS150905 | <i>fliC</i> | H21      | H21   | 100      | 38.736 |            |             | 0          | H21    |
| ERS150986 | <i>fliC</i> | H6       | H6    | 100      | 45.471 | 8snp       |             | 0.486      | H6     |
| ERS150987 | <i>fliC</i> | H25      | H25   | 100      | 57.923 | 9snp       |             | 0.752      | H25    |

Coverage = percentage of the gene length that was covered

Depth = mean read depth across the length of all alleles which were assigned a top scoring allele number

Diffs = differences between the detected allele and the best scoring allele.

Uncertainty = details of parts of the top scoring alleles for which the depth of coverage was too low to give confidence in the result

Divergence = divergence of allele detected to sequence database (ran with option to report <10% divergence)

Reported =reported phenotype of the isolate

SRST2 = call from short read data and the EcOH database

BLAST+ = call from BLAST analysis of Velvet assemblies and the EcOH database



**Supplementary Table 5: Serotyping results for Ont, O-rough and H non-motile EPEC isolates**

| Isolate   | Gene | Reported | SRST2 | Coverage | Depth   | Diffs       | Uncertainty | Divergence | BLAST+ |
|-----------|------|----------|-------|----------|---------|-------------|-------------|------------|--------|
| ERS085336 | wzx  | Ont      | NC    | NA       | NA      |             |             | NA         | NC     |
| ERS085336 | wzy  | Ont      | NC    | NA       | NA      |             |             | NA         | NC     |
| ERS085341 | wzx  | Ont      | O70   | 100      | 185.571 | 33snp       |             | 2.638      | O70    |
| ERS085341 | wzy  | Ont      | O70   | 99.844   | 197.629 | 38snp2indel |             | 2.966      | O70    |
| ERS085354 | wzx  | Ont      | O109  | 100      | 134.956 | 3snp        |             | 0.22       | O109   |
| ERS085354 | wzy  | Ont      | O109  | 100      | 141.635 | 4snp        |             | 0.328      | O109   |
| ERS085358 | wzx  | Ont      | O76   | 100      | 120.394 | 5snp        |             | 0.404      | O76    |
| ERS085358 | wzy  | Ont      | O76   | 100      | 114.389 | 7snp        |             | 0.568      | O76    |
| ERS085359 | wzx  | Ont      | O26   | 100      | 154.225 | 1snp        |             | 0.079      | O26    |
| ERS085359 | wzy  | Ont      | O26   | 100      | 148.533 |             |             | 0          | O26    |
| ERS085362 | wzx  | Ont      | NC    | NA       | NA      |             |             | NA         | NC     |
| ERS085362 | wzy  | Ont      | O64   | 100      | 158.971 |             |             | 0          | O64    |
| ERS085372 | wzx  | Ont      | NC    | NA       | NA      |             |             | NA         | NC     |
| ERS085372 | wzy  | Ont      | O64   | 100      | 140.513 |             |             | 0          | O64    |
| ERS085374 | wzx  | Ont      | NC    | NA       | NA      |             |             | NA         | NC     |
| ERS085374 | wzy  | Ont      | O64   | 100      | 101.947 |             |             | 0          | O64    |
| ERS085375 | wzx  | Ont      | O70   | 100      | 129.649 | 33snp       |             | 2.638      | O70    |
| ERS085375 | wzy  | Ont      | O70   | 100      | 136.112 | 39snp       |             | 3.044      | O70    |
| ERS085376 | wzx  | Ont      | O114  | 100      | 5.664   |             |             | 0          | O70    |
| ERS085376 | wzy  | Ont      | O114  | 99.399   | 5.322   | 3snp8holes  |             | 0.227      | O70    |
| ERS085381 | wzx  | Ont      | O34   | 100      | 130.231 |             |             | 0          | O34    |
| ERS085381 | wzy  | Ont      | O34   | 100      | 89.523  |             |             | 0          | O34    |
| ERS085387 | wzx  | Ont      | O90   | 100      | 72.689  |             |             | 0          | O90    |
| ERS085387 | wzy  | Ont      | O127  | 100      | 65.123  |             |             | 0          | O127   |
| ERS085390 | wzx  | Ont      | O88   | 100      | 87.992  |             |             | 0          | O88    |
| ERS085390 | wzy  | Ont      | O88   | 100      | 96.843  | 1snp        |             | 0.078      | O88    |
| ERS085394 | wzx  | Ont      | O109  | 99.927   | 92.018  | 2snp1indel  |             | 0.147      | O109   |
| ERS085394 | wzy  | Ont      | O109  | 100      | 81.336  | 4snp        |             | 0.328      | O109   |
| ERS085408 | wzx  | Ont      | O70   | 100      | 141.529 | 33snp       |             | 2.638      | O70    |
| ERS085408 | wzy  | Ont      | O70   | 99.922   | 136.988 | 39snp1indel |             | 3.044      | O70    |

**Supplementary Table 5: Serotyping results for Ont, O-rough and H non-motile EPEC isolates**

| Isolate   | Gene | Reported | SRST2 | Coverage | Depth   | Diffs        | Uncertainty | Divergence | BLAST+ |
|-----------|------|----------|-------|----------|---------|--------------|-------------|------------|--------|
| ERS085412 | wzx  | Ont      | O109  | 100      | 162.467 | 3snp         |             | 0.22       | O109   |
| ERS085412 | wzy  | Ont      | O109  | 100      | 128.314 | 4snp         |             | 0.328      | O109   |
| ERS085417 | wzx  | Ont      | O70   | 100      | 103.173 | 33snp        |             | 2.638      | O70    |
| ERS085417 | wzy  | Ont      | O70   | 99.844   | 104.934 | 38snp2indel  |             | 2.966      | O70    |
| ERS085419 | wzx  | Ont      | O70   | 100      | 126.867 | 33snp        |             | 2.638      | O70    |
| ERS085419 | wzy  | Ont      | O70   | 99.844   | 112.893 | 38snp2indel  |             | 2.966      | O70    |
| ERS085420 | wzx  | Ont      | O70   | 100      | 96.098  | 33snp        |             | 2.638      | O70    |
| ERS085420 | wzy  | Ont      | O70   | 99.844   | 96.757  | 38snp2indel  |             | 2.966      | O70    |
| ERS085430 | wzx  | Ont      | O114  | 100      | 227.896 | 1snp         |             | 0.08       | O114   |
| ERS085430 | wzy  | Ont      | O114  | 99.925   | 189.239 | 3snp1indel   |             | 0.225      | O114   |
| ERS085431 | wzx  | Ont      | O34   | 100      | 190.42  |              |             | 0          | O34    |
| ERS085431 | wzy  | Ont      | O34   | 100      | 116.44  |              |             | 0          | O34    |
| ERS085432 | wzx  | Ont      | O70   | 99.92    | 390.332 | 32snp1indel  |             | 2.558      | O70    |
| ERS085432 | wzy  | Ont      | O70   | 99.844   | 361.153 | 38snp2indel  |             | 2.966      | O70    |
| ERS085433 | wzx  | Ont      | O34   | 100      | 304.169 |              |             | 0          | O34    |
| ERS085433 | wzy  | Ont      | O34   | 100      | 307.107 |              |             | 0          | O34    |
| ERS085440 | wzx  | Ont      | NC    | NA       | NA      |              |             | NA         | NC     |
| ERS085440 | wzy  | Ont      | NC    | NA       | NA      |              |             | NA         | NC     |
| ERS139204 | wzx  | Ont      | O109  | 100      | 90.28   | 3snp         |             | 0.22       | O109   |
| ERS139204 | wzy  | Ont      | O109  | 100      | 78.575  | 4snp         |             | 0.328      | O109   |
| ERS139206 | wzm  | Ont      | O9    | 100      | 36.751  | 4snp         |             | 0.509      | O9     |
| ERS139206 | wzt  | Ont      | O9    | 100      | 32.933  | 39snp        |             | 3.009      | O9     |
| ERS139208 | wzx  | Ont      | O39   | 100      | 105.732 | 2snp         |             | 0.135      | O39    |
| ERS139208 | wzy  | Ont      | O88   | 91.843   | 2.704   | 1snp104holes | edge0.0     | 0.085      | O39    |
| ERS139215 | wzx  | Ont      | O34   | 100      | 68.153  |              |             | 0          | O34    |
| ERS139215 | wzy  | Ont      | O34   | 100      | 69.755  |              |             | 0          | O34    |
| ERS139219 | wzx  | Ont      | O157  | 94.971   | 2.637   | 70holes      | edge0.0     | 0          | O128   |
| ERS139219 | wzy  | Ont      | O128  | 100      | 102.856 | 3snp         |             | 0.287      | O128   |
| ERS139220 | wzx  | Ont      | O33   | 100      | 76.047  |              |             | 0          | O33    |
| ERS139220 | wzy  | Ont      | O33   | 100      | 83.085  |              |             | 0          | O33    |

**Supplementary Table 5: Serotyping results for Ont, O-rough and H non-motile EPEC isolates**

| Isolate   | Gene | Reported | SRST2 | Coverage | Depth   | Diffs       | Uncertainty | Divergence | BLAST+ |
|-----------|------|----------|-------|----------|---------|-------------|-------------|------------|--------|
| ERS139224 | wzx  | Ont      | O109  | 100      | 61.055  | 4snp        |             | 0.293      | O109   |
| ERS139224 | wzy  | Ont      | O109  | 100      | 58.426  | 4snp        |             | 0.328      | O109   |
| ERS139238 | wzx  | Ont      | NC    | NA       | NA      |             |             | NA         | NC     |
| ERS139238 | wzy  | Ont      | NC    | NA       | NA      |             |             | NA         | NC     |
| ERS139240 | wzx  | Ont      | NC    | NA       | NA      |             |             | NA         | NC     |
| ERS139240 | wzy  | Ont      | NC    | NA       | NA      |             |             | NA         | NC     |
| ERS139242 | wzx  | Ont      | O70   | 99.92    | 60.178  | 32snp1indel |             | 2.558      | O70    |
| ERS139242 | wzy  | Ont      | O70   | 99.922   | 58.388  | 39snp1indel |             | 3.044      | O70    |
| ERS139250 | wzx  | Ont      | O90   | 100      | 42.056  |             |             | 0          | O90    |
| ERS139250 | wzy  | Ont      | O127  | 100      | 46.384  |             |             | 0          | O127   |
| ERS139257 | wzx  | Ont      | O34   | 100      | 50.952  |             |             | 0          | O34    |
| ERS139257 | wzy  | Ont      | O34   | 100      | 47.025  |             |             | 0          | O34    |
| ERS139260 | wzx  | Ont      | NC    | NA       | NA      |             |             | NA         | NC     |
| ERS139260 | wzy  | Ont      | NC    | NA       | NA      |             |             | NA         | NC     |
| ERS139261 | wzx  | Ont      | O103  | 100      | 34.678  | 1snp        |             | 0.079      | O103   |
| ERS139261 | wzy  | Ont      | O103  | 100      | 30.137  | 3snp        |             | 0.261      | O103   |
| ERS139267 | wzx  | Ont      | O70   | 100      | 77.32   | 33snp       |             | 2.638      | O70    |
| ERS139267 | wzy  | Ont      | O88   | 91.373   | 2.616   | 110holes    | edge0.0     | 0          | O70    |
| ERS139269 | wzx  | Ont      | NC    | NA       | NA      |             |             | NA         | NC     |
| ERS139269 | wzy  | Ont      | O64   | 100      | 57.643  |             |             | 0          | O64    |
| ERS139271 | wzx  | Ont      | NC    | NA       | NA      |             |             | NA         | NC     |
| ERS139271 | wzy  | Ont      | NC    | NA       | NA      |             |             | NA         | NC     |
| ERS139275 | wzx  | Ont      | NC    | NA       | NA      |             |             | NA         | NC     |
| ERS139275 | wzy  | Ont      | NC    | NA       | NA      |             |             | NA         | NC     |
| ERS150870 | wzx  | Ont      | O108  | 100      | 44.597  |             |             | 0          | O108   |
| ERS150870 | wzy  | Ont      | O108  | 100      | 43.803  | 1snp        |             | 0.081      | O108   |
| ERS150903 | wzx  | Ont      | O109  | 99.927   | 93.275  | 2snp1indel  |             | 0.147      | O109   |
| ERS150903 | wzy  | Ont      | O109  | 100      | 87.055  | 4snp        |             | 0.328      | O109   |
| ERS085349 | wzm  | OR       | O101  | 100      | 199.907 |             |             | 0          | O101   |
| ERS085349 | wzt  | OR       | O101  | 100      | 197.597 |             |             | 0          | O101   |

**Supplementary Table 5: Serotyping results for Ont, O-rough and H non-motile EPEC isolates**

| Isolate   | Gene        | Reported | SRST2 | Coverage | Depth   | Diffs       | Uncertainty | Divergence | BLAST+ |
|-----------|-------------|----------|-------|----------|---------|-------------|-------------|------------|--------|
| ERS139216 | <i>wzx</i>  | OR       | O34   | 100      | 63.952  |             |             | 0          | O34    |
| ERS139216 | <i>wzy</i>  | OR       | O34   | 100      | 55.308  |             |             | 0          | O34    |
| ERS139237 | <i>wzx</i>  | OR       | O137  | 100      | 39.501  | 7snp        |             | 0.506      | O137   |
| ERS139237 | <i>wzy</i>  | OR       | O137  | 100      | 34.768  | 2snp        |             | 0.163      | O137   |
| ERS139245 | <i>wzm</i>  | OR       | O162  | 100      | 53.544  |             |             | 0          | O162   |
| ERS139245 | <i>wzt</i>  | OR       | O101  | 100      | 57.154  |             |             | 0          | O101   |
| ERS139246 | <i>wzm</i>  | OR       | O162  | 100      | 51.044  |             |             | 0          | O162   |
| ERS139246 | <i>wzt</i>  | OR       | O101  | 100      | 57.466  |             |             | 0          | O101   |
| ERS139259 | <i>wzx</i>  | OR       | O33   | 100      | 48.576  |             |             | 0          | O33    |
| ERS139259 | <i>wzy</i>  | OR       | O33   | 100      | 53.975  |             |             | 0          | O33    |
| ERS150873 | <i>wzx</i>  | OR       | NC    | NA       | NA      |             |             | NA         | NC     |
| ERS150873 | <i>wzy</i>  | OR       | NC    | NA       | NA      |             |             | NA         | NC     |
| ERS150874 | <i>wzm</i>  | OR       | O162  | 100      | 83.037  |             |             | 0          | O162   |
| ERS150874 | <i>wzt</i>  | OR       | O101  | 100      | 70.886  |             |             | 0          | O101   |
| ERS150880 | <i>wzx</i>  | OR       | O33   | 100      | 76.626  |             |             | 0          | O33    |
| ERS150880 | <i>wzy</i>  | OR       | O33   | 100      | 84.053  |             |             | 0          | O33    |
| ERS085334 | <i>fliC</i> | H-       | H8    | 100      | 171.803 |             |             | 0          | H8     |
| ERS085335 | <i>fliC</i> | H-       | H7    | 100      | 164.254 |             |             | 0          | H7     |
| ERS085341 | <i>fliC</i> | H-       | H40   | 100      | 164.423 |             |             | 0          | H40    |
| ERS085342 | <i>fliC</i> | H-       | H8    | 100      | 123.245 |             |             | 0          | H8     |
| ERS085343 | <i>fliC</i> | H-       | H8    | 100      | 137.371 |             |             | 0          | H8     |
| ERS085345 | <i>fliC</i> | H-       | H9    | 100      | 166.283 | 24snp       |             | 1.192      | H9     |
| ERS085350 | <i>fliC</i> | H-       | H9    | 100      | 133.76  | 37snp       |             | 1.838      | H9     |
| ERS085355 | <i>fliC</i> | H-       | H19   | 99.945   | 120.25  | 1snp1holes  |             | 0.055      | H19    |
| ERS085359 | <i>fliC</i> | H-       | H8    | 100      | 153.82  | 1snp        |             | 0.068      | H8     |
| ERS085361 | <i>fliC</i> | H-       | H7    | 100      | 99.548  |             |             | 0          | H7     |
| ERS085364 | <i>fliC</i> | H-       | H25   | 100      | 93.715  | 9snp        |             | 0.752      | H25    |
| ERS085366 | <i>fliC</i> | H-       | H9    | 99.702   | 148.351 | 28snp6indel |             | 1.391      | H9     |
| ERS085377 | <i>fliC</i> | H-       | H2    | 100      | 133.426 |             |             | 0          | H2     |
| ERS085381 | <i>fliC</i> | H-       | H9    | 100      | 152.894 | 37snp       |             | 1.838      | H9     |

**Supplementary Table 5: Serotyping results for Ont, O-rough and H non-motile EPEC isolates**

| Isolate   | Gene        | Reported | SRST2 | Coverage | Depth   | Diffs       | Uncertainty | Divergence | BLAST+ |
|-----------|-------------|----------|-------|----------|---------|-------------|-------------|------------|--------|
| ERS085382 | <i>fliC</i> | H-       | H19   | 99.945   | 113.356 | 1snp1holes  |             | 0.055      | H19    |
| ERS085383 | <i>fliC</i> | H-       | H7    | 100      | 104.609 |             |             | 0          | H7     |
| ERS085384 | <i>fliC</i> | H-       | H33   | 100      | 141.447 |             |             | 0          | H33    |
| ERS085392 | <i>fliC</i> | H-       | H19   | 99.945   | 148.771 | 1snp1holes  |             | 0.055      | H19    |
| ERS085395 | <i>fliC</i> | H-       | H6    | 100      | 133.961 | 7snp        |             | 0.425      | NC     |
| ERS085396 | <i>fliC</i> | H-       | H33   | 100      | 118.134 |             |             | 0          | H33    |
| ERS085398 | <i>fliC</i> | H-       | H2    | 100      | 95.828  |             |             | 0          | H2     |
| ERS085399 | <i>fliC</i> | H-       | H2    | 100      | 130.3   |             |             | 0          | H2     |
| ERS085402 | <i>fliC</i> | H-       | H33   | 100      | 82.505  |             |             | 0          | H33    |
| ERS085404 | <i>fliC</i> | H-       | H7    | 100      | 77.354  |             |             | 0          | H7     |
| ERS085406 | <i>fliC</i> | H-       | H6    | 100      | 125.39  | 7snp        |             | 0.425      | NC     |
| ERS085410 | <i>fliC</i> | H-       | H19   | 99.945   | 143.09  | 1snp1holes  |             | 0.055      | H19    |
| ERS085413 | <i>fliC</i> | H-       | H11   | 100      | 127.093 |             |             | 0          | NC     |
| ERS085415 | <i>fliC</i> | H-       | H19   | 99.945   | 105.188 | 1snp1holes  |             | 0.055      | H19    |
| ERS085416 | <i>fliC</i> | H-       | H19   | 99.945   | 162.938 | 1snp1holes  |             | 0.055      | H19    |
| ERS085418 | <i>fliC</i> | H-       | H11   | 100      | 96.629  |             |             | 0          | NC     |
| ERS085421 | <i>fliC</i> | H-       | H8    | 100      | 138.059 |             |             | 0          | H8     |
| ERS085424 | <i>fliC</i> | H-       | H6    | 100      | 106.886 | 7snp        |             | 0.425      | NC     |
| ERS085427 | <i>fliC</i> | H-       | H8    | 100      | 124.048 |             |             | 0          | H8     |
| ERS085431 | <i>fliC</i> | H-       | H9    | 99.95    | 283.015 | 36snp1indel |             | 1.788      | H9     |
| ERS085433 | <i>fliC</i> | H-       | H9    | 100      | 295.631 | 37snp       |             | 1.838      | H9     |
| ERS085434 | <i>fliC</i> | H-       | H39   | 100      | 343.823 | 1snp        |             | 0.077      | H39    |
| ERS085436 | <i>fliC</i> | H-       | H39   | 100      | 514.031 | 1snp        |             | 0.077      | H39    |
| ERS085437 | <i>fliC</i> | H-       | H10   | 100      | 342.423 |             |             | 0          | H10    |
| ERS085440 | <i>fliC</i> | H-       | H5    | 99.924   | 299.827 | 2snp1holes  |             | 0.153      | H5     |
| ERS139199 | <i>fliC</i> | H-       | H33   | 100      | 77.114  |             |             | 0          | H33    |
| ERS139207 | <i>fliC</i> | H-       | H8    | 100      | 55.726  |             |             | 0          | H8     |
| ERS139208 | <i>fliC</i> | H-       | H25   | 100      | 7.046   | 62snp       |             | 5.18       | H12    |
| ERS139211 | <i>fliC</i> | H-       | NC    | NA       | NA      |             |             | NA         | NC     |
| ERS139214 | <i>fliC</i> | H-       | H10   | 100      | 32.675  |             |             | 0          | H10    |

**Supplementary Table 5: Serotyping results for Ont, O-rough and H non-motile EPEC isolates**

| Isolate   | Gene        | Reported | SRST2 | Coverage | Depth  | Diffs        | Uncertainty | Divergence | BLAST+ |
|-----------|-------------|----------|-------|----------|--------|--------------|-------------|------------|--------|
| ERS139215 | <i>fliC</i> | H-       | H9    | 100      | 60.308 | 37snp        |             | 1.838      | H9     |
| ERS139220 | <i>fliC</i> | H-       | H6    | 100      | 81.875 | 7snp         |             | 0.425      | NC     |
| ERS139221 | <i>fliC</i> | H-       | H25   | 100      | 43.863 | 9snp         |             | 0.752      | H25    |
| ERS139222 | <i>fliC</i> | H-       | H19   | 99.945   | 79.334 | 1snp1holes   |             | 0.055      | H19    |
| ERS139226 | <i>fliC</i> | H-       | H7    | 100      | 32.095 |              |             | 0          | H7     |
| ERS139231 | <i>fliC</i> | H-       | H39   | 100      | 81.977 | 1snp         |             | 0.077      | H39    |
| ERS139232 | <i>fliC</i> | H-       | H6    | 100      | 76.83  | 7snp         |             | 0.425      | NC     |
| ERS139237 | <i>fliC</i> | H-       | H6    | 100      | 32.871 | 8snp         |             | 0.486      | H6     |
| ERS139239 | <i>fliC</i> | H-       | H8    | 100      | 50.486 |              |             | 0          | H8     |
| ERS139245 | <i>fliC</i> | H-       | H33   | 100      | 52.827 |              |             | 0          | H33    |
| ERS139246 | <i>fliC</i> | H-       | H33   | 100      | 59.738 |              |             | 0          | H33    |
| ERS139252 | <i>fliC</i> | H-       | H39   | 100      | 44.975 |              |             | 0          | H39    |
| ERS139254 | <i>fliC</i> | H-       | H19   | 99.945   | 30.896 | 1snp1holes   |             | 0.055      | H19    |
| ERS139256 | <i>fliC</i> | H-       | NC    | NA       | NA     |              |             | NA         | NC     |
| ERS139257 | <i>fliC</i> | H-       | H19   | 96.508   | 16.902 | 27snp64holes |             | 1.526      | H9     |
| ERS139261 | <i>fliC</i> | H-       | H8    | 100      | 31.164 |              |             | 0          | H8     |
| ERS139264 | <i>fliC</i> | H-       | H11   | 100      | 50.218 | 1snp         |             | 0.073      | NC     |
| ERS139276 | <i>fliC</i> | H-       | H8    | 100      | 54.568 |              |             | 0          | H8     |
| ERS139278 | <i>fliC</i> | H-       | H2    | 100      | 28.806 | 12snp        |             | 0.803      | H2     |
| ERS150871 | <i>fliC</i> | H-       | H33   | 100      | 87.918 |              |             | 0          | H33    |
| ERS150874 | <i>fliC</i> | H-       | H33   | 100      | 75.486 |              |             | 0          | H33    |
| ERS150879 | <i>fliC</i> | H-       | H2    | 100      | 84.74  |              |             | 0          | H2     |
| ERS150882 | <i>fliC</i> | H-       | H10   | 100      | 61.873 |              |             | 0          | H10    |
| ERS150883 | <i>fliC</i> | H-       | H9    | 100      | 72.286 | 29snp        |             | 1.441      | H9     |
| ERS150906 | <i>fliC</i> | H-       | H10   | 100      | 87.46  |              |             | 0          | H10    |

NC = No in silico call was made

NA = Not available

Ont = O non-typeable

OR = O rough

**Supplementary Table 5: Serotyping results for Ont, O-rough and H non-motile EPEC isolates**

| Isolate | Gene | Reported | SRST2 | Coverage | Depth | Diffs | Uncertainty | Divergence | BLAST+ |
|---------|------|----------|-------|----------|-------|-------|-------------|------------|--------|
|---------|------|----------|-------|----------|-------|-------|-------------|------------|--------|

H- = H non-motile

Coverage = percentage of the gene length that was covered

Depth = mean read depth across the length of all alleles which were assigned a top scoring allele number

Diffs = differences between the detected allele and the best scoring allele.

Uncertainty = details of parts of the top scoring alleles for which the depth of coverage was too low to give confidence in the result

Divergence = divergence of allele detected to sequence database (ran with option to report <10% divergence)

Reported =reported phenotype of the isolate

SRST2 = call from short read data and the EcOH database

BLAST+ = call from BLAST analysis of Velvet assemblies and the EcOH database
