# Supplementary material
Source: publisher figshare collection journal article supplement (https://microbiology.figshare.com/articles/dataset/_/3385777)
Supplement: Supplementary file 4 [file 1]

**Supplementary Table 1: EcOH database information**

| Type | Gene | Allele   | Accession  | Function  |
|------|------|----------|------------|-----------|
| H1   | fliC | fliC-H1  | AB028471.1 | flagellin |
| H1   | fliC | fliC-H1  | L07387.1   | flagellin |
| H10  | fliC | fliC-H10 | AY337482.1 | flagellin |
| H10  | fliC | fliC-H10 | AY249995.1 | flagellin |
| H11  | fliC | fliC-H11 | AY337465.1 | flagellin |
| H11  | fliC | fliC-H11 | AY337472.1 | flagellin |
| H11  | fliC | fliC-H11 | AY249996.1 | flagellin |
| H12  | fliC | fliC-H12 | AY337471.1 | flagellin |
| H12  | fliC | fliC-H12 | AY337474.1 | flagellin |
| H12  | fliC | fliC-H12 | AY249997.1 | flagellin |
| H14  | fliC | fliC-H14 | AY249998.1 | flagellin |
| H15  | fliC | fliC-H15 | AY249999.1 | flagellin |
| H16  | fliC | fliC-H16 | AY337475.1 | flagellin |
| H16  | fliC | fliC-H16 | AY337476.1 | flagellin |
| H16  | fliC | fliC-H16 | AY337477.1 | flagellin |
| H16  | fliC | fliC-H16 | AY250000.1 | flagellin |
| H18  | fliC | fliC-H18 | AY250001.1 | flagellin |
| H19  | fliC | fliC-H19 | AY337479.1 | flagellin |
| H19  | fliC | fliC-H19 | AY250002.1 | flagellin |
| H2   | fliC | fliC-H2  | AF543692   | flagellin |
| H2   | fliC | fliC-H2  | HQ116826   | flagellin |
| H20  | fliC | fliC-H20 | AY250003.1 | flagellin |
| H21  | fliC | fliC-H21 | AY250004.1 | flagellin |
| H23  | fliC | fliC-H23 | AY250005.1 | flagellin |
| H24  | fliC | fliC-H24 | AY250006.1 | flagellin |
| H25  | fliC | fliC-H25 | AY250007.1 | flagellin |
| H26  | fliC | fliC-H26 | AY250008.1 | flagellin |
| H27  | fliC | fliC-H27 | AY250009.1 | flagellin |
| H28  | fliC | fliC-H28 | AY250010.1 | flagellin |
| H29  | fliC | fliC-H29 | AY250012.1 | flagellin |
| H30  | fliC | fliC-H30 | AY250011.1 | flagellin |
| H31  | fliC | fliC-H31 | AY250013.1 | flagellin |
| H32  | fliC | fliC-H32 | AY250014.1 | flagellin |
| H33  | fliC | fliC-H33 | AY250015.1 | flagellin |
| H34  | fliC | fliC-H34 | AY250016.1 | flagellin |
| H34  | fliC | fliC-H34 | AF34585    | flagellin |
| H37  | fliC | fliC-H37 | AY250017.1 | flagellin |
| H38  | fliC | fliC-H38 | AY337466.1 | flagellin |
| H38  | fliC | fliC-H38 | AY337473.1 | flagellin |
| H38  | fliC | fliC-H38 | AY250018.1 | flagellin |
| H39  | fliC | fliC-H39 | AY250019.1 | flagellin |
| H4   | fliC | fliC-H4  | AJ536600.1 | flagellin |
| H4   | fliC | fliC-H4  | AJ605764.1 | flagellin |
| H4   | fliC | fliC-H4  | AJ605765.1 | flagellin |
| H4   | fliC | fliC-H4  | AY249989.1 | flagellin |
| H40  | fliC | fliC-H40 | AJ865464.1 | flagellin |
| H40  | fliC | fliC-H40 | AJ884568.1 | flagellin |
| H41  | fliC | fliC-H41 | AY250020.1 | flagellin |
| H42  | fliC | fliC-H42 | AY250021.1 | flagellin |
| H43  | fliC | fliC-H43 | AY250022.1 | flagellin |
| H45  | fliC | fliC-H45 | AY250023.1 | flagellin |
| H46  | fliC | fliC-H46 | AB028478.1 | flagellin |
| H46  | fliC | fliC-H46 | AY250024.1 | flagellin |
| H48  | fliC | fliC-H48 | AY250025.1 | flagellin |
| H49  | fliC | fliC-H49 | AB028480.1 | flagellin |

**Supplementary Table 1: EcOH database information**

| Type | Gene | Allele        | Accession  | Function                           |
|------|------|---------------|------------|------------------------------------|
| H49  | fliC | fliC-H49      | AY250026.1 | flagellin                          |
| H5   | fliC | fliC-H5       | AY337469.1 | flagellin                          |
| H5   | fliC | fliC-H5       | AY249990.1 | flagellin                          |
| H51  | fliC | fliC-H51      | AB028481.1 | flagellin                          |
| H51  | fliC | fliC-H51      | AY250027.1 | flagellin                          |
| H52  | fliC | fliC-H52      | AY250028.1 | flagellin                          |
| H56  | fliC | fliC-H56      | AY250029.1 | flagellin                          |
| H6   | fliC | fliC-H6       | AY249991.1 | flagellin                          |
| H7   | fliC | fliC-H7       | AF228487.1 | flagellin                          |
| H7   | fliC | fliC-H7       | AF228491.1 | flagellin                          |
| H7   | fliC | fliC-H7       | AF228492.1 | flagellin                          |
| H7   | fliC | fliC-H7       | AF228494.1 | flagellin                          |
| H7   | fliC | fliC-H7       | AF228495.1 | flagellin                          |
| H7   | fliC | fliC-H7       | AF228496.1 | flagellin                          |
| H7   | fliC | fliC-H7       | AY337468.1 | flagellin                          |
| H7   | fliC | fliC-H7       | AB334574.1 | flagellin                          |
| H7   | fliC | fliC-H7       | AB334575.1 | flagellin                          |
| H7   | fliC | fliC-H7       | AY249992.1 | flagellin                          |
| H8   | fliC | fliC-H8       | AJ865465.1 | flagellin                          |
| H8   | fliC | fliC-H8       | AJ884569.1 | flagellin                          |
| H9   | fliC | fliC-H9       | AY249994.1 | flagellin                          |
| H3   | flkA | flkA-H3       | AB128916   | flagellin                          |
| H35  | flkA | flkA-H35      | EF392692   | flagellin                          |
| H36  | flkA | flkA-H36      | EF392693   | flagellin                          |
| H47  | flkA | flkA-H47      | EF392694   | flagellin                          |
| H53  | flkA | flkA-H53      | AB128917   | flagellin                          |
| H44  | flIA | flIA-H44      | #VALUE!    | flagellin                          |
| H55  | flIA | flIA-H55      | AB269771   | flagellin                          |
| H54  | flmA | flmA-H54      | AB128918   | flagellin                          |
| H17  | flnA | flnA-H17      | CP002291   | flagellin                          |
| O101 | wzm  | wzm-O101-Gp15 | AB812046.1 | O-antigen ABC transporter permease |
| O162 | wzm  | wzm-O162-Gp15 | AB812067.1 | O-antigen ABC transporter permease |
| O52  | wzm  | wzm-O52       | AY528413.1 | O-antigen ABC transporter permease |
| O60  | wzm  | wzm-O60       | AB812022.1 | O-antigen ABC transporter permease |
| O8   | wzm  | wzm-O8        | AB010150.1 | O-antigen ABC transporter permease |
| O8   | wzm  | wzm-O8        | AB811598.1 | O-antigen ABC transporter permease |
| O89  | wzm  | wzm-O89-Gp15  | AB812038.1 | O-antigen ABC transporter permease |
| O9   | wzm  | wzm-O9        | AB010294.1 | O-antigen ABC transporter permease |
| O9   | wzm  | wzm-O9        | D43637     | O-antigen ABC transporter permease |
| O92  | wzm  | wzm-O92       | AB812040.1 | O-antigen ABC transporter permease |
| O95  | wzm  | wzm-O95       | AB812042.1 | O-antigen ABC transporter permease |
| O97  | wzm  | wzm-O97       | AB812044.1 | O-antigen ABC transporter permease |
| O99  | wzm  | wzm-O99       | FJ940773.1 | O-antigen ABC transporter permease |
| O101 | wzt  | wzt-O101-Gp15 | AB812046.1 | ATP-binding protein                |
| O162 | wzt  | wzt-O162-Gp15 | AB812067.1 | ATP-binding protein                |
| O52  | wzt  | wzt-O52       | AY528413.1 | ATP-binding protein                |
| O60  | wzt  | wzt-O60       | AB812022.1 | ATP-binding protein                |
| O8   | wzt  | wzt-O8        | AB010150.1 | ATP-binding protein                |
| O8   | wzt  | wzt-O8        | AB811598.1 | ATP-binding protein                |
| O89  | wzt  | wzt-O89-Gp15  | AB812038.1 | ATP-binding protein                |
| O9   | wzt  | wzt-O9        | AB010294.1 | ATP-binding protein                |
| O9   | wzt  | wzt-O9        | D43637     | ATP-binding protein                |
| O92  | wzt  | wzt-O92       | AB812040.1 | ATP-binding protein                |
| O95  | wzt  | wzt-O95       | AB812042.1 | ATP-binding protein                |
| O97  | wzt  | wzt-O97       | AB812044.1 | ATP-binding protein                |

**Supplementary Table 1: EcOH database information**

| Type   | Gene | Allele        | Accession  | Function            |
|--------|------|---------------|------------|---------------------|
| O99    | wzt  | wzt-O99       | FJ940773.1 | ATP-binding protein |
| O1     | wzx  | wzx-O1        | GU299791.1 | O antigen flippase  |
| O10    | wzx  | wzx-O10       | AB811599.1 | O antigen flippase  |
| O100   | wzx  | wzx-O100      | AB812045.1 | O antigen flippase  |
| O102   | wzx  | wzx-O102      | JX087966.1 | O antigen flippase  |
| O102   | wzx  | wzx-O102      | AB812047.1 | O antigen flippase  |
| O103   | wzx  | wzx-O103      | AY532664.1 | O antigen flippase  |
| O103   | wzx  | wzx-O103      | EF027106.1 | O antigen flippase  |
| O103   | wzx  | wzx-O103      | AB704860.1 | O antigen flippase  |
| O104   | wzx  | wzx-O104      | AF361371.1 | O antigen flippase  |
| O104   | wzx  | wzx-O104      | CP003301.1 | O antigen flippase  |
| O105   | wzx  | wzx-O105      | EU294171.1 | O antigen flippase  |
| O106   | wzx  | wzx-O106-Gp9  | DQ000315.1 | O antigen flippase  |
| O106   | wzx  | wzx-O106-Gp9  | AB972417.1 | O antigen flippase  |
| O107   | wzx  | wzx-O107--Gp8 | EU694095.1 | O antigen flippase  |
| O108   | wzx  | wzx-O108      | AB812048.1 | O antigen flippase  |
| O109   | wzx  | wzx-O109      | HM485572.1 | O antigen flippase  |
| O11    | wzx  | wzx-O11       | HQ388393.1 | O antigen flippase  |
| O110   | wzx  | wzx-O110      | AB812049.1 | O antigen flippase  |
| O111   | wzx  | wzx-O111      | AF078736.1 | O antigen flippase  |
| O111   | wzx  | wzx-O111      | AP010960   | O antigen flippase  |
| O112ab | wzx  | wzx-O112      | EU296413.1 | O antigen flippase  |
| O112ac | wzx  | wzx-O112      | AB812050.1 | O antigen flippase  |
| O113   | wzx  | wzx-O113      | AF172324.1 | O antigen flippase  |
| O114   | wzx  | wzx-O114      | AY573377.1 | O antigen flippase  |
| O115   | wzx  | wzx-O115      | GU068041.1 | O antigen flippase  |
| O116   | wzx  | wzx-O116      | AB812051.1 | O antigen flippase  |
| O117   | wzx  | wzx-O117-Gp8  | DQ465247.1 | O antigen flippase  |
| O117   | wzx  | wzx-O117-Gp8  | EU694096.1 | O antigen flippase  |
| O118   | wzx  | wzx-O118-Gp3  | HM204927.1 | O antigen flippase  |
| O118   | wzx  | wzx-O118-Gp3  | AB972418.1 | O antigen flippase  |
| O119   | wzx  | wzx-O119      | GQ499368.1 | O antigen flippase  |
| O12    | wzx  | wzx-O12       | AB811600.1 | O antigen flippase  |
| O120   | wzx  | wzx-O120      | AB812052.1 | O antigen flippase  |
| O121   | wzx  | wzx-O121      | AY208937.1 | O antigen flippase  |
| O121   | wzx  | wzx-O121      | JN859209.1 | O antigen flippase  |
| O121   | wzx  | wzx-O121      | JN859212.1 | O antigen flippase  |
| O121   | wzx  | wzx-O121      | JN859216.1 | O antigen flippase  |
| O123   | wzx  | wzx-O123-Gp5  | DQ676933.1 | O antigen flippase  |
| O123   | wzx  | wzx-O123-Gp5  | DQ676934.1 | O antigen flippase  |
| O123   | wzx  | wzx-O123-Gp5  | AB972419.1 | O antigen flippase  |
| O124   | wzx  | wzx-O124-Gp13 | EU296419.1 | O antigen flippase  |
| O124   | wzx  | wzx-O124-Gp13 | AB972420.1 | O antigen flippase  |
| O125   | wzx  | wzx-O125      | AB812053.1 | O antigen flippase  |
| O126   | wzx  | wzx-O126      | DQ465248.1 | O antigen flippase  |
| O126   | wzx  | wzx-O126      | GU068042.1 | O antigen flippase  |
| O127   | wzx  | wzx-O127-Gp4  | AY493508.1 | O antigen flippase  |
| O127   | wzx  | wzx-O127-Gp4  | FM180568.1 | O antigen flippase  |
| O127   | wzx  | wzx-O127-Gp4  | AB812054.1 | O antigen flippase  |
| O128   | wzx  | wzx-O128      | AY217096.1 | O antigen flippase  |
| O129   | wzx  | wzx-O129-Gp10 | EU296424.1 | O antigen flippase  |
| O129   | wzx  | wzx-O129-Gp10 | AB972421.1 | O antigen flippase  |
| O13    | wzx  | wzx-O13-Gp10  | AB972413.1 | O antigen flippase  |
| O130   | wzx  | wzx-O130      | EU296421.1 | O antigen flippase  |
| O131   | wzx  | wzx-O131      | AB812055.1 | O antigen flippase  |

**Supplementary Table 1: EcOH database information**

| Type | Gene | Allele        | Accession  | Function           |
|------|------|---------------|------------|--------------------|
| O132 | WZX  | wzx-O132      | AB812056.1 | O antigen flippase |
| O133 | WZX  | wzx-O133      | AB812057.1 | O antigen flippase |
| O134 | WZX  | wzx-O134-Gp6  | AB812058.1 | O antigen flippase |
| O135 | WZX  | wzx-O135-Gp10 | EU296423.1 | O antigen flippase |
| O135 | WZX  | wzx-O135-Gp10 | AB972422.1 | O antigen flippase |
| O136 | WZX  | wzx-O136      | AB812059.1 | O antigen flippase |
| O137 | WZX  | wzx-O137-Gp1  | AB972423.1 | O antigen flippase |
| O138 | WZX  | wzx-O138      | DQ109551.1 | O antigen flippase |
| O139 | WZX  | wzx-O139      | DQ109552.1 | O antigen flippase |
| O140 | WZX  | wzx-O140      | AB812060.1 | O antigen flippase |
| O141 | WZX  | wzx-O141      | DQ868765.1 | O antigen flippase |
| O142 | WZX  | wzx-O142      | AB812061.1 | O antigen flippase |
| O143 | WZX  | wzx-O143      | EU294164.1 | O antigen flippase |
| O144 | WZX  | wzx-O144      | AB812062.1 | O antigen flippase |
| O145 | WZX  | wzx-O145      | AY647260.1 | O antigen flippase |
| O145 | WZX  | wzx-O145      | CP006262.1 | O antigen flippase |
| O145 | WZX  | wzx-O145      | JN850039.1 | O antigen flippase |
| O146 | WZX  | wzx-O146      | DQ465249.1 | O antigen flippase |
| O147 | WZX  | wzx-O147      | DQ868766.1 | O antigen flippase |
| O148 | WZX  | wzx-O148      | DQ167407.1 | O antigen flippase |
| O149 | WZX  | wzx-O149      | DQ868764.1 | O antigen flippase |
| O15  | WZX  | wzx-O15       | AY647261.1 | O antigen flippase |
| O150 | WZX  | wzx-O150      | EU294168.1 | O antigen flippase |
| O151 | WZX  | wzx-O151-Gp3  | AB972424.1 | O antigen flippase |
| O152 | WZX  | wzx-O152      | EU294170.1 | O antigen flippase |
| O153 | WZX  | wzx-O153-Gp11 | AB812063.1 | O antigen flippase |
| O154 | WZX  | wzx-O154      | AB812064.1 | O antigen flippase |
| O155 | WZX  | wzx-O155      | AY657020.1 | O antigen flippase |
| O156 | WZX  | wzx-O156      | AB812065.1 | O antigen flippase |
| O157 | WZX  | wzx-O157      | AF061251.1 | O antigen flippase |
| O157 | WZX  | wzx-O157      | AB602249.1 | O antigen flippase |
| O157 | WZX  | wzx-O157      | AB602250.1 | O antigen flippase |
| O157 | WZX  | wzx-O157      | AB602252.1 | O antigen flippase |
| O157 | WZX  | wzx-O157      | AB602253.1 | O antigen flippase |
| O158 | WZX  | wzx-O158      | GU068044.1 | O antigen flippase |
| O159 | WZX  | wzx-O159      | EU294176.1 | O antigen flippase |
| O16  | WZX  | wzx-O16       | AB811601.1 | O antigen flippase |
| O160 | WZX  | wzx-O160      | AB812066.1 | O antigen flippase |
| O161 | WZX  | wzx-O161      | GU220361.1 | O antigen flippase |
| O163 | WZX  | wzx-O163      | AB812068.1 | O antigen flippase |
| O164 | WZX  | wzx-O164-Gp13 | EU296420.1 | O antigen flippase |
| O164 | WZX  | wzx-O164-Gp13 | AB972425.1 | O antigen flippase |
| O165 | WZX  | wzx-O165      | GU068045.1 | O antigen flippase |
| O166 | WZX  | wzx-O166      | GU299794.1 | O antigen flippase |
| O167 | WZX  | wzx-O167      | EU296408.1 | O antigen flippase |
| O168 | WZX  | wzx-O168      | EU296403.1 | O antigen flippase |
| O169 | WZX  | wzx-O169-Gp16 | AB812069.1 | O antigen flippase |
| O17  | WZX  | wzx-O17-Gp9   | AB812084.1 | O antigen flippase |
| O170 | WZX  | wzx-O170      | AB812070.1 | O antigen flippase |
| O171 | WZX  | wzx-O171      | AB812071.1 | O antigen flippase |
| O172 | WZX  | wzx-O172      | AY545992.1 | O antigen flippase |
| O173 | WZX  | wzx-O173      | GU068046.1 | O antigen flippase |
| O174 | WZX  | wzx-O174      | DQ008592.1 | O antigen flippase |
| O174 | WZX  | wzx-O174      | AB812072.1 | O antigen flippase |
| O175 | WZX  | wzx-O175      | AB812073.1 | O antigen flippase |

**Supplementary Table 1: EcOH database information**

| Type  | Gene | Allele        | Accession  | Function           |
|-------|------|---------------|------------|--------------------|
| O176  | wzx  | wzx-O176      | AB812074.1 | O antigen flippase |
| O177  | wzx  | wzx-O177      | DQ008593.1 | O antigen flippase |
| O178  | wzx  | wzx-O178-Gp11 | AB812075.1 | O antigen flippase |
| O179  | wzx  | wzx-O179      | AB812076.1 | O antigen flippase |
| O18   | wzx  | wzx-O18-Gp12  | GU299793.1 | O antigen flippase |
| O180  | wzx  | wzx-O180      | JQ751058.1 | O antigen flippase |
| O180  | wzx  | wzx-O180      | AB812077.1 | O antigen flippase |
| O181  | wzx  | wzx-O181      | AB812078.1 | O antigen flippase |
| O182  | wzx  | wzx-O182      | AB812079.1 | O antigen flippase |
| O183  | wzx  | wzx-O183-Gp16 | AB627352.1 | O antigen flippase |
| O184  | wzx  | wzx-O184      | AB812080.1 | O antigen flippase |
| O185  | wzx  | wzx-O185      | AB812081.1 | O antigen flippase |
| O186  | wzx  | wzx-O186-Gp5  | AB812082.1 | O antigen flippase |
| O187  | wzx  | wzx-O187      | AB812083.1 | O antigen flippase |
| O18ab | wzx  | wzx-O18ab     | AB811602.1 | O antigen flippase |
| O18ac | wzx  | wzx-O18ac     | AB811603.1 | O antigen flippase |
| O19   | wzx  | wzx-O19       | AB811604.1 | O antigen flippase |
| O2    | wzx  | wzx-O2-Gp7    | EU549863.1 | O antigen flippase |
| O2    | wzx  | wzx-O2-Gp7    | GU299792.1 | O antigen flippase |
| O20   | wzx  | wzx-O20-Gp1   | AB811605.1 | O antigen flippase |
| O21   | wzx  | wzx-O21       | EU694098.1 | O antigen flippase |
| O22   | wzx  | wzx-O22       | DQ851855.1 | O antigen flippase |
| O22   | wzx  | wzx-O22       | AB811606.1 | O antigen flippase |
| O23   | wzx  | wzx-O23       | AB811607.1 | O antigen flippase |
| O24   | wzx  | wzx-O24       | DQ220292.1 | O antigen flippase |
| O25   | wzx  | wzx-O25       | GU014554.1 | O antigen flippase |
| O26   | wzx  | wzx-O26       | AF529080.1 | O antigen flippase |
| O27   | wzx  | wzx-O27       | GU014555.1 | O antigen flippase |
| O28ab | wzx  | wzx-O28ab     | AB811608.1 | O antigen flippase |
| O28ac | wzx  | wzx-O28ac-Gp2 | DQ462205.1 | O antigen flippase |
| O28ac | wzx  | wzx-O28ac-Gp2 | AB811609.1 | O antigen flippase |
| O29   | wzx  | wzx-O29       | EU294173.1 | O antigen flippase |
| O3    | wzx  | wzx-O3        | EU694097.1 | O antigen flippase |
| O30   | wzx  | wzx-O30       | AB811610.1 | O antigen flippase |
| O32   | wzx  | wzx-O32       | EU296410.1 | O antigen flippase |
| O33   | wzx  | wzx-O33       | AB811611.1 | O antigen flippase |
| O34   | wzx  | wzx-O34       | AB811612.1 | O antigen flippase |
| O35   | wzx  | wzx-O35       | FJ940774.1 | O antigen flippase |
| O36   | wzx  | wzx-O36       | AB811613.1 | O antigen flippase |
| O37   | wzx  | wzx-O37       | AB811614.1 | O antigen flippase |
| O38   | wzx  | wzx-O38       | AB811615.1 | O antigen flippase |
| O39   | wzx  | wzx-O39       | AB811616.1 | O antigen flippase |
| O4    | wzx  | wzx-O4        | AY568960.1 | O antigen flippase |
| O40   | wzx  | wzx-O40       | EU296417.1 | O antigen flippase |
| O41   | wzx  | wzx-O41       | AB811617.1 | O antigen flippase |
| O42   | wzx  | wzx-O42-Gp2   | FJ539194.1 | O antigen flippase |
| O42   | wzx  | wzx-O42-Gp2   | AB811618.1 | O antigen flippase |
| O43   | wzx  | wzx-O43       | AB811619.1 | O antigen flippase |
| O44   | wzx  | wzx-O44-Gp9   | AB811620.1 | O antigen flippase |
| O45   | wzx  | wzx-O45       | AY771223.1 | O antigen flippase |
| O45   | wzx  | wzx-O45       | CU463050.1 | O antigen flippase |
| O45   | wzx  | wzx-O45       | JN859200.1 | O antigen flippase |
| O45   | wzx  | wzx-O45       | JN859205.1 | O antigen flippase |
| O45   | wzx  | wzx-O45       | JN859208.1 | O antigen flippase |
| O46   | wzx  | wzx-O46-Gp6   | AB811621.1 | O antigen flippase |

**Supplementary Table 1: EcOH database information**

| Type | Gene | Allele       | Accession  | Function           |
|------|------|--------------|------------|--------------------|
| O48  | WZX  | wzx-O48      | AB811622.1 | O antigen flippase |
| O49  | WZX  | wzx-O49      | AB811623.1 | O antigen flippase |
| O5   | WZX  | wzx-O5       | AB811596.1 | O antigen flippase |
| O50  | WZX  | wzx-O50-Gp7  | AB811624.1 | O antigen flippase |
| O51  | WZX  | wzx-O51      | AB812020.1 | O antigen flippase |
| O53  | WZX  | wzx-O53      | AB812021.1 | O antigen flippase |
| O54  | WZX  | wzx-O54      | AB812085.1 | O antigen flippase |
| O55  | WZX  | wzx-O55      | AF461121.1 | O antigen flippase |
| O55  | WZX  | wzx-O55      | AB353132.1 | O antigen flippase |
| O55  | WZX  | wzx-O55      | AB353133.1 | O antigen flippase |
| O56  | WZX  | wzx-O56      | DQ220293.1 | O antigen flippase |
| O58  | WZX  | wzx-O58      | EU294175.1 | O antigen flippase |
| O59  | WZX  | wzx-O59      | AY654590.1 | O antigen flippase |
| O6   | WZX  | wzx-O6       | AJ426045.2 | O antigen flippase |
| O6   | WZX  | wzx-O6       | CP002185.1 | O antigen flippase |
| O6   | WZX  | wzx-O6       | AB811597.1 | O antigen flippase |
| O61  | WZX  | wzx-O61      | GU220362.1 | O antigen flippase |
| O62  | WZX  | wzx-O62-Gp14 | AB812023.1 | O antigen flippase |
| O63  | WZX  | wzx-O63      | FJ539195.1 | O antigen flippase |
| O63  | WZX  | wzx-O63      | AB812024.1 | O antigen flippase |
| O64  | WZX  | wzx-O64      | AB812025.1 | O antigen flippase |
| O65  | WZX  | wzx-O65      | AB812026.1 | O antigen flippase |
| O66  | WZX  | wzx-O66      | DQ069297.1 | O antigen flippase |
| O68  | WZX  | wzx-O68-Gp14 | AB812027.1 | O antigen flippase |
| O69  | WZX  | wzx-O69      | AB812028.1 | O antigen flippase |
| O7   | WZX  | wzx-O7       | AF125322.1 | O antigen flippase |
| O7   | WZX  | wzx-O7       | AB490074.1 | O antigen flippase |
| O7   | WZX  | wzx-O7       | CP003034.1 | O antigen flippase |
| O7   | WZX  | wzx-O7       | JN887675.1 | O antigen flippase |
| O70  | WZX  | wzx-O70      | AB812029.1 | O antigen flippase |
| O71  | WZX  | wzx-O71      | GU445927.1 | O antigen flippase |
| O73  | WZX  | wzx-O73-Gp9  | DQ000313.1 | O antigen flippase |
| O74  | WZX  | wzx-O74      | AB812030.1 | O antigen flippase |
| O75  | WZX  | wzx-O75      | GU299795.1 | O antigen flippase |
| O76  | WZX  | wzx-O76      | AB812031.1 | O antigen flippase |
| O77  | WZX  | wzx-O77-Gp9  | AB972416.1 | O antigen flippase |
| O78  | WZX  | wzx-O78      | FJ940775.1 | O antigen flippase |
| O79  | WZX  | wzx-O79      | EU294162.1 | O antigen flippase |
| O8   | WZX  | wzx-O8       | AF013583.1 | O antigen flippase |
| O8   | WZX  | wzx-O8       | AB811598.1 | O antigen flippase |
| O80  | WZX  | wzx-O80      | AB812032.1 | O antigen flippase |
| O81  | WZX  | wzx-O81      | AB812033.1 | O antigen flippase |
| O82  | WZX  | wzx-O82      | AB812034.1 | O antigen flippase |
| O83  | WZX  | wzx-O83      | AB812035.1 | O antigen flippase |
| O84  | WZX  | wzx-O84      | AB812036.1 | O antigen flippase |
| O85  | WZX  | wzx-O85      | GU299798.1 | O antigen flippase |
| O86  | WZX  | wzx-O86      | AY220982.1 | O antigen flippase |
| O86  | WZX  | wzx-O86      | AY667408.1 | O antigen flippase |
| O86  | WZX  | wzx-O86      | AY670704.1 | O antigen flippase |
| O87  | WZX  | wzx-O87      | EU294177.1 | O antigen flippase |
| O88  | WZX  | wzx-O88      | AB812037.1 | O antigen flippase |
| O90  | WZX  | wzx-O90-Gp4  | AB812039.1 | O antigen flippase |
| O91  | WZX  | wzx-O91      | AY035396.1 | O antigen flippase |
| O93  | WZX  | wzx-O93      | AB812041.1 | O antigen flippase |
| O96  | WZX  | wzx-O96      | AB812043.1 | O antigen flippase |

**Supplementary Table 1: EcOH database information**

| Type   | Gene | Allele        | Accession  | Function             |
|--------|------|---------------|------------|----------------------|
| O98    | wzx  | wzx-O98       | DQ180602.1 | O antigen flippase   |
| O1     | wzy  | wzy-O1        | GU299791.1 | O antigen polymerase |
| O10    | wzy  | wzy-O10       | AB811599.1 | O antigen polymerase |
| O100   | wzy  | wzy-O100      | AB812045.1 | O antigen polymerase |
| O102   | wzy  | wzy-O102      | JX087966.1 | O antigen polymerase |
| O102   | wzy  | wzy-O102      | AB812047.1 | O antigen polymerase |
| O103   | wzy  | wzy-O103      | AY532664.1 | O antigen polymerase |
| O103   | wzy  | wzy-O103      | EF027106.1 | O antigen polymerase |
| O103   | wzy  | wzy-O103      | EF027116.1 | O antigen polymerase |
| O103   | wzy  | wzy-O103      | EF027119.1 | O antigen polymerase |
| O103   | wzy  | wzy-O103      | AB704860.1 | O antigen polymerase |
| O104   | wzy  | wzy-O104      | AF361371.1 | O antigen polymerase |
| O105   | wzy  | wzy-O105      | EU294171.1 | O antigen polymerase |
| O106   | wzy  | wzy-O106-Gp9  | DQ000315.1 | O antigen polymerase |
| O106   | wzy  | wzy-O106-Gp9  | AB972417.1 | O antigen polymerase |
| O107   | wzy  | wzy-O107-Gp8  | EU694095.1 | O antigen polymerase |
| O108   | wzy  | wzy-O108      | AB812048.1 | O antigen polymerase |
| O109   | wzy  | wzy-O109      | HM485572.1 | O antigen polymerase |
| O11    | wzy  | wzy-O11       | HQ388393.1 | O antigen polymerase |
| O110   | wzy  | wzy-O110      | AB812049.1 | O antigen polymerase |
| O111   | wzy  | wzy-O111      | AF078736.1 | O antigen polymerase |
| O111   | wzy  | wzy-O111      | AP010960   | O antigen polymerase |
| O112ac | wzy  | wzy-O112      | AB812050.1 | O antigen polymerase |
| O112ab | wzy  | wzy-O112      | EU296413.1 | O antigen polymerase |
| O113   | wzy  | wzy-O113      | AF172324.1 | O antigen polymerase |
| O114   | wzy  | wzy-O114      | AY573377.1 | O antigen polymerase |
| O115   | wzy  | wzy-O115      | GU068041.1 | O antigen polymerase |
| O116   | wzy  | wzy-O116      | AB812051.1 | O antigen polymerase |
| O117   | wzy  | wzy-O117-Gp8  | DQ465247.1 | O antigen polymerase |
| O117   | wzy  | wzy-O117-Gp8  | EU694096.1 | O antigen polymerase |
| O118   | wzy  | wzy-O118-Gp3  | HM204927.1 | O antigen polymerase |
| O118   | wzy  | wzy-O118-Gp3  | AB972418.1 | O antigen polymerase |
| O119   | wzy  | wzy-O119      | GQ499368.1 | O antigen polymerase |
| O12    | wzy  | wzy-O12       | AB811600.1 | O antigen polymerase |
| O120   | wzy  | wzy-O120      | AB812052.1 | O antigen polymerase |
| O121   | wzy  | wzy-O121      | AY208937.1 | O antigen polymerase |
| O121   | wzy  | wzy-O121      | JN859209.1 | O antigen polymerase |
| O121   | wzy  | wzy-O121      | JN859212.1 | O antigen polymerase |
| O121   | wzy  | wzy-O121      | JN859216.1 | O antigen polymerase |
| O123   | wzy  | wzy-O123-Gp5  | DQ676933.1 | O antigen polymerase |
| O123   | wzy  | wzy-O123-Gp5  | DQ676934.1 | O antigen polymerase |
| O123   | wzy  | wzy-O123-Gp5  | AB972419.1 | O antigen polymerase |
| O124   | wzy  | wzy-O124-Gp13 | EU296419.1 | O antigen polymerase |
| O124   | wzy  | wzy-O124-Gp13 | AB972420.1 | O antigen polymerase |
| O125   | wzy  | wzy-O125      | AB812053.1 | O antigen polymerase |
| O126   | wzy  | wzy-O126      | DQ465248.1 | O antigen polymerase |
| O126   | wzy  | wzy-O126      | GU068042.1 | O antigen polymerase |
| O127   | wzy  | wzy-O127-Gp4  | AY493508.1 | O antigen polymerase |
| O127   | wzy  | wzy-O127-Gp4  | FM180568.1 | O antigen polymerase |
| O127   | wzy  | wzy-O127-Gp4  | AB812054.1 | O antigen polymerase |
| O128   | wzy  | wzy-O128      | AY217096.1 | O antigen polymerase |
| O129   | wzy  | wzy-O129-Gp10 | EU296424.1 | O antigen polymerase |
| O129   | wzy  | wzy-O129-Gp10 | AB972421.1 | O antigen polymerase |
| O13    | wzy  | wzy-O13-Gp10  | AB972413.1 | O antigen polymerase |
| O130   | wzy  | wzy-O130      | EU296421.1 | O antigen polymerase |

**Supplementary Table 1: EcOH database information**

| Type | Gene | Allele        | Accession  | Function             |
|------|------|---------------|------------|----------------------|
| O131 | wzy  | wzy-O131      | AB812055.1 | O antigen polymerase |
| O132 | wzy  | wzy-O132      | AB812056.1 | O antigen polymerase |
| O133 | wzy  | wzy-O133      | AB812057.1 | O antigen polymerase |
| O134 | wzy  | wzy-O134-Gp6  | AB812058.1 | O antigen polymerase |
| O135 | wzy  | wzy-O135-Gp10 | EU296423.1 | O antigen polymerase |
| O135 | wzy  | wzy-O135-Gp10 | AB972422.1 | O antigen polymerase |
| O136 | wzy  | wzy-O136      | AB812059.1 | O antigen polymerase |
| O137 | wzy  | wzy-O137-Gp1  | AB972423.1 | O antigen polymerase |
| O138 | wzy  | wzy-O138      | DQ109551.1 | O antigen polymerase |
| O139 | wzy  | wzy-O139      | DQ109552.1 | O antigen polymerase |
| O140 | wzy  | wzy-O140      | AB812060.1 | O antigen polymerase |
| O141 | wzy  | wzy-O141      | DQ868765.1 | O antigen polymerase |
| O142 | wzy  | wzy-O142      | AB812061.1 | O antigen polymerase |
| O143 | wzy  | wzy-O143      | EU294164.1 | O antigen polymerase |
| O144 | wzy  | wzy-O144      | AB812062.1 | O antigen polymerase |
| O145 | wzy  | wzy-O145      | AY647260.1 | O antigen polymerase |
| O145 | wzy  | wzy-O145      | CP006262.1 | O antigen polymerase |
| O145 | wzy  | wzy-O145      | JN850039.1 | O antigen polymerase |
| O146 | wzy  | wzy-O146      | DQ465249.1 | O antigen polymerase |
| O147 | wzy  | wzy-O147      | DQ868766.1 | O antigen polymerase |
| O148 | wzy  | wzy-O148      | DQ167407.1 | O antigen polymerase |
| O149 | wzy  | wzy-O149      | DQ868764.1 | O antigen polymerase |
| O15  | wzy  | wzy-O15       | AY647261.1 | O antigen polymerase |
| O150 | wzy  | wzy-O150      | EU294168.1 | O antigen polymerase |
| O151 | wzy  | wzy-O151-Gp3  | AB972424.1 | O antigen polymerase |
| O152 | wzy  | wzy-O152      | EU294170.1 | O antigen polymerase |
| O153 | wzy  | wzy-O153-Gp11 | AB812063.1 | O antigen polymerase |
| O154 | wzy  | wzy-O154      | AB812064.1 | O antigen polymerase |
| O155 | wzy  | wzy-O155      | AY657020.1 | O antigen polymerase |
| O156 | wzy  | wzy-O156      | AB812065.1 | O antigen polymerase |
| O157 | wzy  | wzy-O157      | AF061251.1 | O antigen polymerase |
| O157 | wzy  | wzy-O157      | AB602249.1 | O antigen polymerase |
| O157 | wzy  | wzy-O157      | AB602250.1 | O antigen polymerase |
| O157 | wzy  | wzy-O157      | AB602252.1 | O antigen polymerase |
| O157 | wzy  | wzy-O157      | AB602253.1 | O antigen polymerase |
| O158 | wzy  | wzy-O158      | GU068044.1 | O antigen polymerase |
| O159 | wzy  | wzy-O159      | EU294176.1 | O antigen polymerase |
| O16  | wzy  | wzy-O16       | AB811601.1 | O antigen polymerase |
| O160 | wzy  | wzy-O160      | AB812066.1 | O antigen polymerase |
| O161 | wzy  | wzy-O161      | GU220361.1 | O antigen polymerase |
| O163 | wzy  | wzy-O163      | AB812068.1 | O antigen polymerase |
| O164 | wzy  | wzy-O164-Gp13 | EU296420.1 | O antigen polymerase |
| O164 | wzy  | wzy-O164-Gp13 | AB972425.1 | O antigen polymerase |
| O165 | wzy  | wzy-O165      | GU068045.1 | O antigen polymerase |
| O166 | wzy  | wzy-O166      | GU299794.1 | O antigen polymerase |
| O167 | wzy  | wzy-O167      | EU296408.1 | O antigen polymerase |
| O168 | wzy  | wzy-O168      | EU296403.1 | O antigen polymerase |
| O169 | wzy  | wzy-O169-Gp16 | AB812069.1 | O antigen polymerase |
| O17  | wzy  | wzy-O17-Gp9   | AB812084.1 | O antigen polymerase |
| O170 | wzy  | wzy-O170      | AB812070.1 | O antigen polymerase |
| O171 | wzy  | wzy-O171      | AB812071.1 | O antigen polymerase |
| O172 | wzy  | wzy-O172      | AY545992.1 | O antigen polymerase |
| O173 | wzy  | wzy-O173      | GU068046.1 | O antigen polymerase |
| O174 | wzy  | wzy-O174      | DQ008592.1 | O antigen polymerase |
| O174 | wzy  | wzy-O174      | AB812072.1 | O antigen polymerase |



**Supplementary Table 1: EcOH database information**

| Type  | Gene | Allele        | Accession  | Function             |
|-------|------|---------------|------------|----------------------|
| O175  | wzy  | wzy-O175      | AB812073.1 | O antigen polymerase |
| O176  | wzy  | wzy-O176      | AB812074.1 | O antigen polymerase |
| O177  | wzy  | wzy-O177      | DQ008593.1 | O antigen polymerase |
| O178  | wzy  | wzy-O178-Gp11 | AB812075.1 | O antigen polymerase |
| O179  | wzy  | wzy-O179      | AB812076.1 | O antigen polymerase |
| O18   | wzy  | wzy-O18-Gp12  | GU299793.1 | O antigen polymerase |
| O180  | wzy  | wzy-O180      | JQ751058.1 | O antigen polymerase |
| O180  | wzy  | wzy-O180      | AB812077.1 | O antigen polymerase |
| O181  | wzy  | wzy-O181      | AB812078.1 | O antigen polymerase |
| O182  | wzy  | wzy-O182      | AB812079.1 | O antigen polymerase |
| O183  | wzy  | wzy-O183-Gp16 | AB627352.1 | O antigen polymerase |
| O184  | wzy  | wzy-O184      | AB812080.1 | O antigen polymerase |
| O185  | wzy  | wzy-O185      | AB812081.1 | O antigen polymerase |
| O186  | wzy  | wzy-O186-Gp5  | AB812082.1 | O antigen polymerase |
| O187  | wzy  | wzy-O187      | AB812083.1 | O antigen polymerase |
| O18ab | wzy  | wzy-O18ab     | AB811602.1 | O antigen polymerase |
| O18ac | wzy  | wzy-O18ac     | AB811603.1 | O antigen polymerase |
| O19   | wzy  | wzy-O19       | AB811604.1 | O antigen polymerase |
| O2    | wzy  | wzy-O2-Gp7    | EU549863.1 | O antigen polymerase |
| O2    | wzy  | wzy-O2-Gp7    | GU299792.1 | O antigen polymerase |
| O20   | wzy  | wzy-O20-Gp1   | AB811605.1 | O antigen polymerase |
| O21   | wzy  | wzy-O21       | EU694098.1 | O antigen polymerase |
| O22   | wzy  | wzy-O22       | DQ851855.1 | O antigen polymerase |
| O22   | wzy  | wzy-O22       | AB811606.1 | O antigen polymerase |
| O23   | wzy  | wzy-O23       | AB811607.1 | O antigen polymerase |
| O24   | wzy  | wzy-O24       | DQ220292.1 | O antigen polymerase |
| O25   | wzy  | wzy-O25       | GU014554.1 | O antigen polymerase |
| O26   | wzy  | wzy-O26       | AF529080.1 | O antigen polymerase |
| O27   | wzy  | wzy-O27       | GU014555.1 | O antigen polymerase |
| O28ab | wzy  | wzy-O28ab     | AB811608.1 | O antigen polymerase |
| O28ac | wzy  | wzy-O28ac-Gp2 | DQ462205.1 | O antigen polymerase |
| O28ac | wzy  | wzy-O28ac-Gp2 | AB811609.1 | O antigen polymerase |
| O29   | wzy  | wzy-O29       | EU294173.1 | O antigen polymerase |
| O3    | wzy  | wzy-O3        | EU694097.1 | O antigen polymerase |
| O30   | wzy  | wzy-O30       | AB811610.1 | O antigen polymerase |
| O32   | wzy  | wzy-O32       | EU296410.1 | O antigen polymerase |
| O33   | wzy  | wzy-O33       | AB811611.1 | O antigen polymerase |
| O34   | wzy  | wzy-O34       | AB811612.1 | O antigen polymerase |
| O35   | wzy  | wzy-O35       | FJ940774.1 | O antigen polymerase |
| O36   | wzy  | wzy-O36       | AB811613.1 | O antigen polymerase |
| O37   | wzy  | wzy-O37       | AB811614.1 | O antigen polymerase |
| O38   | wzy  | wzy-O38       | AB811615.1 | O antigen polymerase |
| O39   | wzy  | wzy-O39       | AB811616.1 | O antigen polymerase |
| O4    | wzy  | wzy-O4        | AY568960.1 | O antigen polymerase |
| O40   | wzy  | wzy-O40       | EU296417.1 | O antigen polymerase |
| O41   | wzy  | wzy-O41       | AB811617.1 | O antigen polymerase |
| O42   | wzy  | wzy-O42-Gp2   | FJ539194.1 | O antigen polymerase |
| O42   | wzy  | wzy-O42-Gp2   | AB811618.1 | O antigen polymerase |
| O43   | wzy  | wzy-O43       | AB811619.1 | O antigen polymerase |
| O44   | wzy  | wzy-O44-Gp9   | AB811620.1 | O antigen polymerase |
| O45   | wzy  | wzy-O45       | AY771223.1 | O antigen polymerase |
| O45   | wzy  | wzy-O45       | CU463050.1 | O antigen polymerase |
| O45   | wzy  | wzy-O45       | JN859200.1 | O antigen polymerase |
| O45   | wzy  | wzy-O45       | JN859205.1 | O antigen polymerase |
| O45   | wzy  | wzy-O45       | JN859208.1 | O antigen polymerase |

**Supplementary Table 1: EcOH database information**

| Type | Gene | Allele       | Accession  | Function             |
|------|------|--------------|------------|----------------------|
| O46  | wzy  | wzy-O46-Gp6  | AB811621.1 | O antigen polymerase |
| O48  | wzy  | wzy-O48      | AB811622.1 | O antigen polymerase |
| O49  | wzy  | wzy-O49      | AB811623.1 | O antigen polymerase |
| O5   | wzy  | wzy-O5       | AB811596.1 | O antigen polymerase |
| O50  | wzy  | wzy-O50-Gp7  | AB811624.1 | O antigen polymerase |
| O51  | wzy  | wzy-O51      | AB812020.1 | O antigen polymerase |
| O53  | wzy  | wzy-O53      | AB812021.1 | O antigen polymerase |
| O54  | wzy  | wzy-O54      | AB812085.1 | O antigen polymerase |
| O55  | wzy  | wzy-O55      | AF461121.1 | O antigen polymerase |
| O55  | wzy  | wzy-O55      | AB353132.1 | O antigen polymerase |
| O55  | wzy  | wzy-O55      | AB353133.1 | O antigen polymerase |
| O56  | wzy  | wzy-O56      | DQ220293.1 | O antigen polymerase |
| O58  | wzy  | wzy-O58      | EU294175.1 | O antigen polymerase |
| O59  | wzy  | wzy-O59      | AY654590.1 | O antigen polymerase |
| O6   | wzy  | wzy-O6       | AJ426045.2 | O antigen polymerase |
| O6   | wzy  | wzy-O6       | CP002185.1 | O antigen polymerase |
| O6   | wzy  | wzy-O6       | AB811597.1 | O antigen polymerase |
| O61  | wzy  | wzy-O61      | GU220362.1 | O antigen polymerase |
| O62  | wzy  | wzy-O62-Gp14 | AB812023.1 | O antigen polymerase |
| O63  | wzy  | wzy-O63      | FJ539195.1 | O antigen polymerase |
| O63  | wzy  | wzy-O63      | AB812024.1 | O antigen polymerase |
| O64  | wzy  | wzy-O64      | AB812025.1 | O antigen polymerase |
| O65  | wzy  | wzy-O65      | AB812026.1 | O antigen polymerase |
| O66  | wzy  | wzy-O66      | DQ069297.1 | O antigen polymerase |
| O68  | wzy  | wzy-O68-Gp14 | AB812027.1 | O antigen polymerase |
| O69  | wzy  | wzy-O69      | AB812028.1 | O antigen polymerase |
| O7   | wzy  | wzy-O7       | AF125322.1 | O antigen polymerase |
| O7   | wzy  | wzy-O7       | AB490074.1 | O antigen polymerase |
| O7   | wzy  | wzy-O7       | JN887675.1 | O antigen polymerase |
| O70  | wzy  | wzy-O70      | AB812029.1 | O antigen polymerase |
| O71  | wzy  | wzy-O71      | GU445927.1 | O antigen polymerase |
| O73  | wzy  | wzy-O73-Gp9  | DQ000313.1 | O antigen polymerase |
| O74  | wzy  | wzy-O74      | AB812030.1 | O antigen polymerase |
| O75  | wzy  | wzy-O75      | GU299795.1 | O antigen polymerase |
| O76  | wzy  | wzy-O76      | AB812031.1 | O antigen polymerase |
| O77  | wzy  | wzy-O77-Gp9  | AB972416.1 | O antigen polymerase |
| O78  | wzy  | wzy-O78      | FJ940775.1 | O antigen polymerase |
| O79  | wzy  | wzy-O79      | EU294162.1 | O antigen polymerase |
| O8   | wzy  | wzy-O8       | AF013583.1 | O antigen polymerase |
| O8   | wzy  | wzy-O8       | AB811598.1 | O antigen polymerase |
| O80  | wzy  | wzy-O80      | AB812032.1 | O antigen polymerase |
| O81  | wzy  | wzy-O81      | AB812033.1 | O antigen polymerase |
| O82  | wzy  | wzy-O82      | AB812034.1 | O antigen polymerase |
| O83  | wzy  | wzy-O83      | AB812035.1 | O antigen polymerase |
| O84  | wzy  | wzy-O84      | AB812036.1 | O antigen polymerase |
| O85  | wzy  | wzy-O85      | GU299798.1 | O antigen polymerase |
| O86  | wzy  | wzy-O86      | AY220982.1 | O antigen polymerase |
| O86  | wzy  | wzy-O86      | AY667408.1 | O antigen polymerase |
| O86  | wzy  | wzy-O86      | AY670704.1 | O antigen polymerase |
| O87  | wzy  | wzy-O87      | EU294177.1 | O antigen polymerase |
| O88  | wzy  | wzy-O88      | AB812037.1 | O antigen polymerase |
| O90  | wzy  | wzy-O90-Gp4  | AB812039.1 | O antigen polymerase |
| O91  | wzy  | wzy-O91      | AY035396.1 | O antigen polymerase |
| O93  | wzy  | wzy-O93      | AB812041.1 | O antigen polymerase |
| O96  | wzy  | wzy-O96      | AB812043.1 | O antigen polymerase |

**Supplementary Table 1: EcOH database information**

| Type      | Gene | Allele       | Accession  | Function                           |
|-----------|------|--------------|------------|------------------------------------|
| O98       | wzy  | wzy-O98      | DQ180602.1 | O antigen polymerase               |
| O116var1  | wzy  | wzy-O116var1 | ERS085345  | O antigen polymerase               |
| O116var1  | wzx  | wzx-O116var1 | ERS085345  | O antigen flippase                 |
| O124var1  | wzy  | wzy-O124var1 | ERS085400  | O antigen polymerase               |
| O2var1    | wzx  | wzx-O2var1   | ERS085421  | O antigen flippase                 |
| O2var1    | wzy  | wzy-O2var1   | ERS085421  | O antigen polymerase               |
| O153var1  | wzx  | wzx-O153var1 | ERS139265  | O antigen flippase                 |
| O153var1  | wzy  | wzy-O153var1 | ERS139265  | O antigen polymerase               |
| O153var2  | wzx  | wzx-O153var2 | ERS085437  | O antigen flippase                 |
| O153var2  | wzy  | wzy-O153var2 | ERS085437  | O antigen polymerase               |
| O108var1  | wzx  | wzx-O108var1 | ERS150902  | O antigen flippase                 |
| O108var1  | wzy  | wzy-O108var1 | ERS150902  | O antigen polymerase               |
| Onovel32  | wzm  | wzm-Onovel32 | SRR2544773 | O-antigen ABC transporter permease |
| Onovel32  | wzt  | wzt-Onovel32 | SRR2544773 | ATP-binding protein                |
| O174-like | wzx  | wzx-O174     | ERR119568  | O antigen flippase                 |
| O174-like | wzy  | wzy-O174     | ERR119568  | O antigen polymerase               |
| O9-like   | wzm  | wzm-O9       | SRR1181545 | O-antigen ABC transporter permease |
| O9-like   | wzt  | wzt-O9       | SRR1181545 | ATP-binding protein                |
| O22-like  | wzx  | wzx-O22      | SRR1505391 | O antigen flippase                 |
| O22-like  | wzy  | wzy-O22      | SRR1505391 | O antigen polymerase               |
| Onovel31  | wzx  | wzx-Onovel31 | SRR1982228 | O antigen flippase                 |
| Onovel31  | wzy  | wzy-Onovel31 | SRR1982228 | O antigen polymerase               |
| Onovel1   | wzx  | wzx-Onovel1  | ERR178232  | O antigen flippase                 |
| Onovel1   | wzy  | wzy-Onovel1  | ERR178232  | O antigen polymerase               |
| Onovel1   | wzy  | wzy-Onovel1  | SRR2960802 | O antigen polymerase               |
| Onovel1   | wzx  | wzx-Onovel1  | SRR2960802 | O antigen flippase                 |
| Onovel2   | wzx  | wzx-Onovel2  | SRR1198904 | O antigen flippase                 |
| Onovel2   | wzy  | wzy-Onovel2  | SRR1198904 | O antigen polymerase               |
| Onovel3   | wzx  | wzx-Onovel3  | SRR1570089 | O antigen flippase                 |
| Onovel3   | wzy  | wzy-Onovel3  | SRR1570089 | O antigen polymerase               |
| Onovel3   | wzy  | wzy-Onovel3  | SRR2890038 | O antigen polymerase               |
| Onovel3   | wzx  | wzx-Onovel3  | SRR2890038 | O antigen flippase                 |
| Onovel4   | wzy  | wzy-Onovel4  | SRR2085677 | O antigen polymerase               |
| Onovel4   | wzx  | wzx-Onovel4  | SRR2085677 | O antigen flippase                 |
| Onovel5   | wzy  | wzy-Onovel5  | SRR2970275 | O antigen polymerase               |
| Onovel5   | wzx  | wzx-Onovel5  | SRR2970275 | O antigen flippase                 |
| Onovel6   | wzy  | wzy-Onovel6  | SRR2970282 | O antigen polymerase               |
| Onovel6   | wzx  | wzx-Onovel6  | SRR2970282 | O antigen flippase                 |
| Onovel7   | wzy  | wzy-Onovel7  | SRR2970285 | O antigen polymerase               |
| Onovel7   | wzx  | wzx-Onovel7  | SRR2970285 | O antigen flippase                 |
| O108var1  | wzy  | wzy-O108var1 | SRR2133165 | O antigen polymerase               |
| O108var1  | wzx  | wzx-O108var1 | SRR2133165 | O antigen flippase                 |
| Onovel8   | wzx  | wzx-Onovel8  | SRR2970151 | O antigen flippase                 |
| Onovel8   | wzy  | wzy-Onovel8  | SRR2970151 | O antigen polymerase               |
| Onovel9   | wzy  | wzy-Onovel9  | SRR2970153 | O antigen polymerase               |
| Onovel9   | wzx  | wzx-Onovel9  | SRR2970153 | O antigen flippase                 |
| Onovel10  | wzy  | wzy-Onovel10 | SRR2970219 | O antigen polymerase               |
| Onovel10  | wzx  | wzx-Onovel10 | SRR2970219 | O antigen flippase                 |
| Onovel11  | wzy  | wzy-Onovel11 | SRR2970229 | O antigen polymerase               |
| Onovel11  | wzx  | wzx-Onovel11 | SRR2970229 | O antigen flippase                 |
| Onovel12  | wzy  | wzy-Onovel12 | ERR084469  | O antigen polymerase               |
| Onovel12  | wzx  | wzx-Onovel12 | ERR084469  | O antigen flippase                 |
| Onovel13  | wzx  | wzx-Onovel13 | ERR084477  | O antigen flippase                 |
| Onovel13  | wzy  | wzy-Onovel13 | ERR084477  | O antigen polymerase               |
| Onovel14  | wzx  | wzx-Onovel14 | ERR089731  | O antigen flippase                 |

**Supplementary Table 1: EcOH database information**

| Type     | Gene | Allele       | Accession  | Function             |
|----------|------|--------------|------------|----------------------|
| Onovel14 | wzy  | wzy-Onovel14 | ERR089731  | O antigen polyermase |
| Onovel15 | wzx  | wzx-Onovel15 | ERR119540  | O antigen flippase   |
| Onovel15 | wzy  | wzy-Onovel15 | ERR119540  | O antigen polyermase |
| Onovel16 | wzy  | wzy-Onovel16 | ERR769193  | O antigen polyermase |
| Onovel16 | wzx  | wzx-Onovel16 | ERR769193  | O antigen flippase   |
| Onovel17 | wzy  | wzy-Onovel17 | SRR1181555 | O antigen polyermase |
| Onovel17 | wzx  | wzx-Onovel17 | SRR1181555 | O antigen flippase   |
| Onovel18 | wzy  | wzy-Onovel18 | SRR1269403 | O antigen polyermase |
| Onovel18 | wzx  | wzx-Onovel18 | SRR1269403 | O antigen flippase   |
| Onovel19 | wzy  | wzy-Onovel19 | SRR1269405 | O antigen polyermase |
| Onovel19 | wzx  | wzx-Onovel19 | SRR1269405 | O antigen flippase   |
| Onovel20 | wzx  | wzx-Onovel20 | SRR1272883 | O antigen flippase   |
| Onovel20 | wzy  | wzy-Onovel20 | SRR1272883 | O antigen polyermase |
| Onovel21 | wzx  | wzx-Onovel21 | SRR1505461 | O antigen flippase   |
| Onovel21 | wzy  | wzy-Onovel21 | SRR1505461 | O antigen polyermase |
| Onovel22 | wzy  | wzy-Onovel22 | SRR1918972 | O antigen polyermase |
| Onovel22 | wzx  | wzx-Onovel22 | SRR1918972 | O antigen flippase   |
| Onovel23 | wzy  | wzy-Onovel23 | SRR2085700 | O antigen polyermase |
| Onovel23 | wzx  | wzx-Onovel23 | SRR2085700 | O antigen flippase   |
| Onovel24 | wzx  | wzx-Onovel24 | SRR2724181 | O antigen flippase   |
| Onovel24 | wzy  | wzy-Onovel24 | SRR2724181 | O antigen polyermase |
| Onovel25 | wzy  | wzy-Onovel25 | SRR2912311 | O antigen polyermase |
| Onovel25 | wzx  | wzx-Onovel25 | SRR2912311 | O antigen flippase   |
| Onovel26 | wzx  | wzx-Onovel26 | SRR2960801 | O antigen flippase   |
| Onovel26 | wzy  | wzy-Onovel26 | SRR2960801 | O antigen polyermase |
| Onovel27 | wzx  | wzx-Onovel27 | SRR2970162 | O antigen flippase   |
| Onovel27 | wzy  | wzy-Onovel27 | SRR2970162 | O antigen polyermase |
| Onovel28 | wzy  | wzy-Onovel28 | SRR2970178 | O antigen polyermase |
| Onovel28 | wzx  | wzx-Onovel28 | SRR2970178 | O antigen flippase   |
| Onovel29 | wzy  | wzy-Onovel29 | SRR2970183 | O antigen polyermase |
| Onovel29 | wzx  | wzx-Onovel29 | SRR2970183 | O antigen flippase   |
| Onovel30 | wzy  | wzy-Onovel30 | SRR2970185 | O antigen polyermase |
| Onovel30 | wzx  | wzx-Onovel30 | SRR2970185 | O antigen flippase   |
